# Supplementary material for: High aspect ratio nanomaterial-induced macrophage polarization is mediated by changes in miRNA levels
Source: PubMed Central journal article supplement (PMC9911541; doi:10.3389/fimmu.2023.1111123), 2023-01-27
Supplement: Presentation_1.pdf [file Presentation_1.pdf]

## Supplementary Material

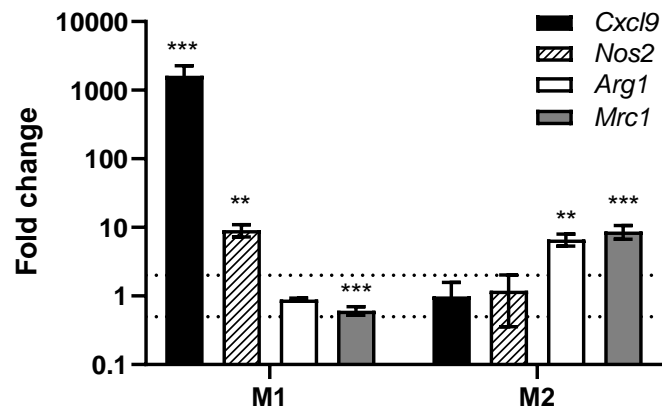

**Supplementary Figure 1.** Characterization of macrophage polarization. Air-lifted MH-S macrophages were polarized towards M1 or M2 phenotypes for 24h with IFNG and IL4/IL13, respectively. Gene expression of M1 markers (*Cxcl9* and *Nos2*) and M2 markers (*Arg1* and *Mrc1*) was assessed by qPCR. Reported values represent fold changes in gene expression relative to the mean expression in unstimulated macrophages (without addition of activators), which was set to 1. Data represent mean  $\pm$  SD, (n=5), \*\*p<0.01, \*\*\*p<0.001.

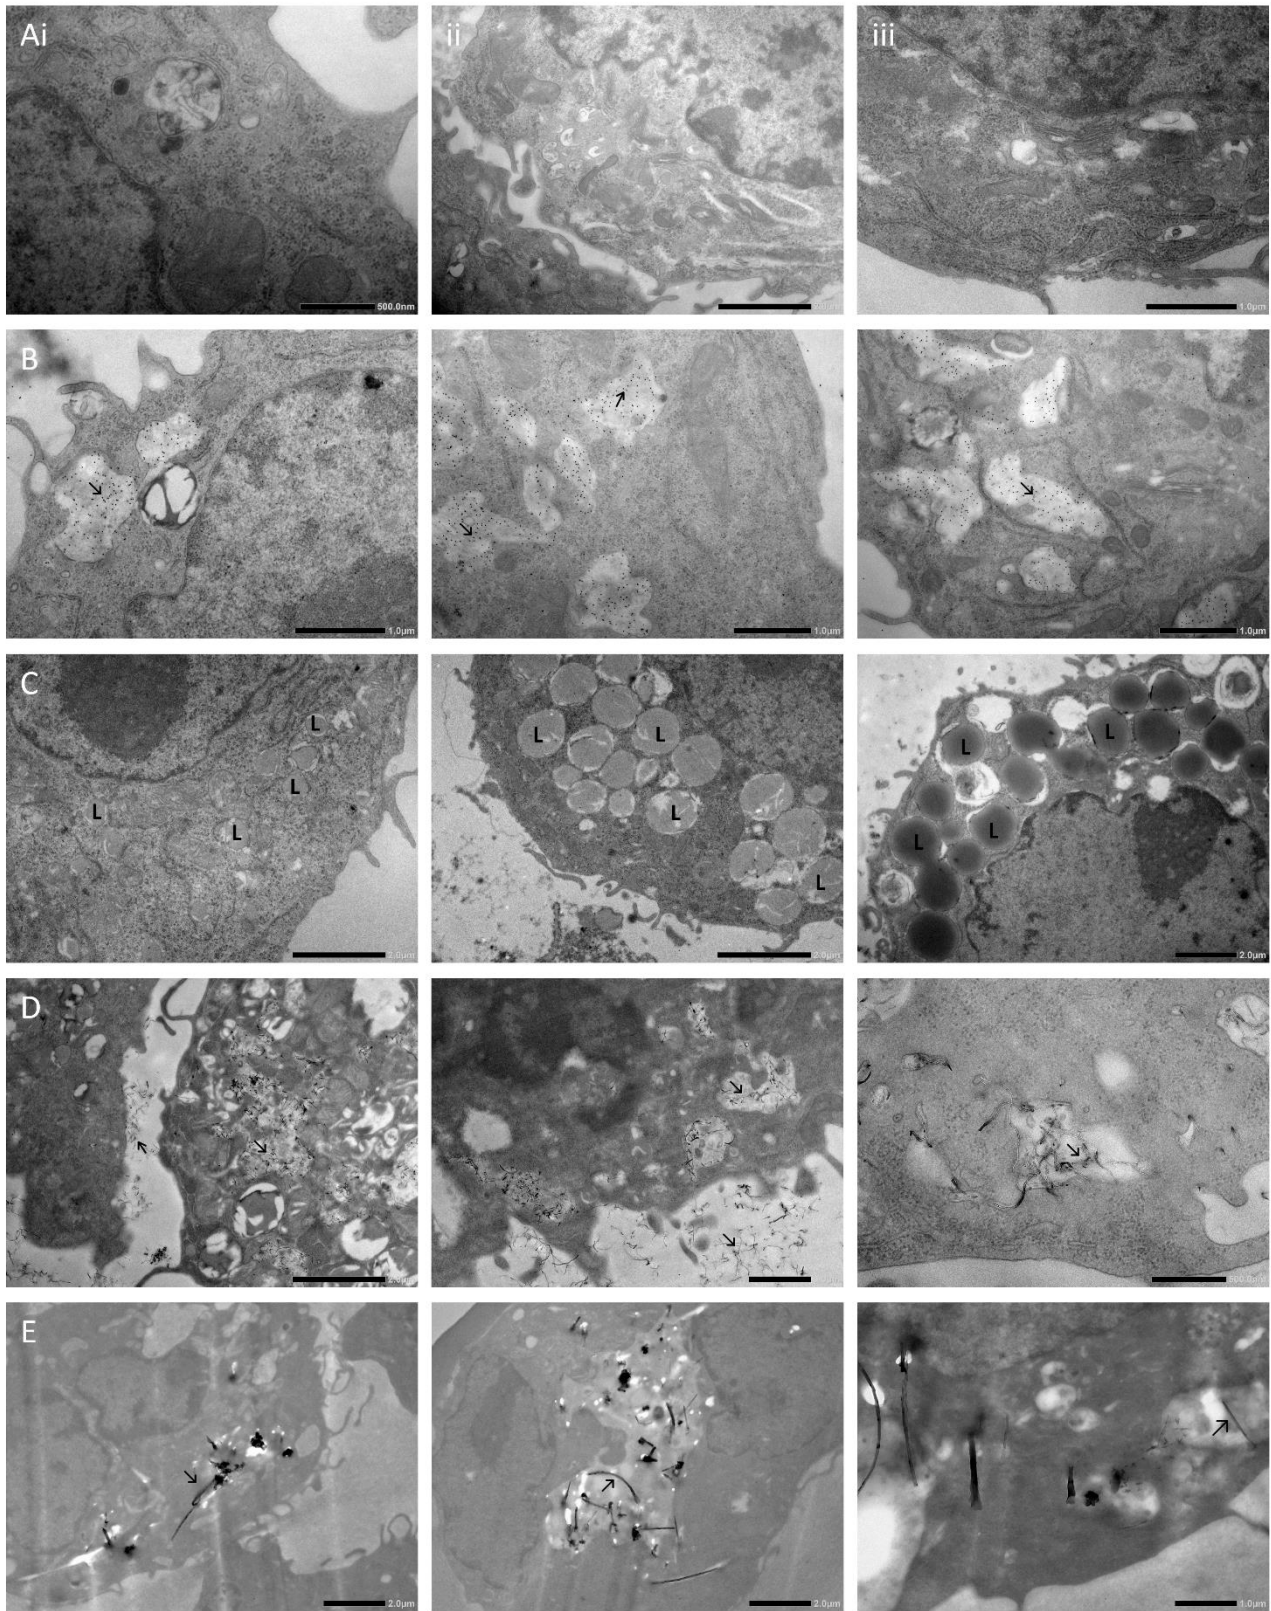

**Supplementary Figure 2.** Cellular uptake of nanomaterials. Representative TEM images show nanoparticle uptake in i) M0, ii) M1, and iii) M2 macrophages 24h after exposure with A) dispersion

media (control), B) CNC, C) CNF, D) NM-400, and E) NM-401. The experiment was repeated twice. Black arrows indicate endosomal structures with nanomaterials. White arrows indicate fibers in cell cytoplasm. L indicates lysosomal structures.

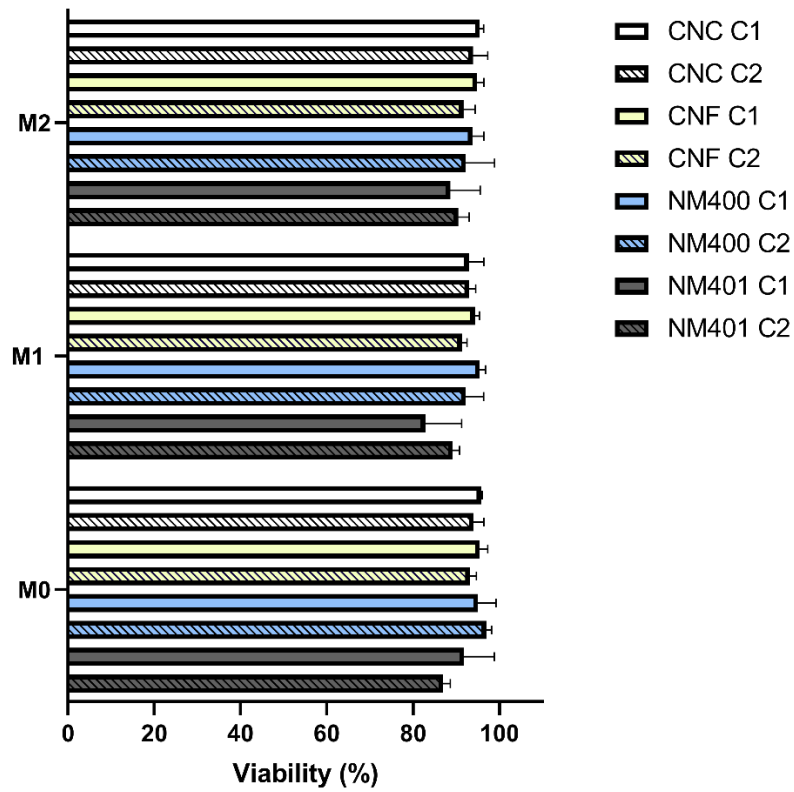

**Supplementary Figure 3.** Effects of nanoparticle exposure on cell viability. Cell viability was assessed in unpolarized (M0), M1 and M2 macrophages 24h after exposure to CNC, CNF, NM-400 and NM-401. C1: 0.15  $\mu\text{g}/\text{cm}^2$  and C2: 2.7  $\mu\text{g}/\text{cm}^2$ . Data indicate mean $\pm$ SEM, n=3.

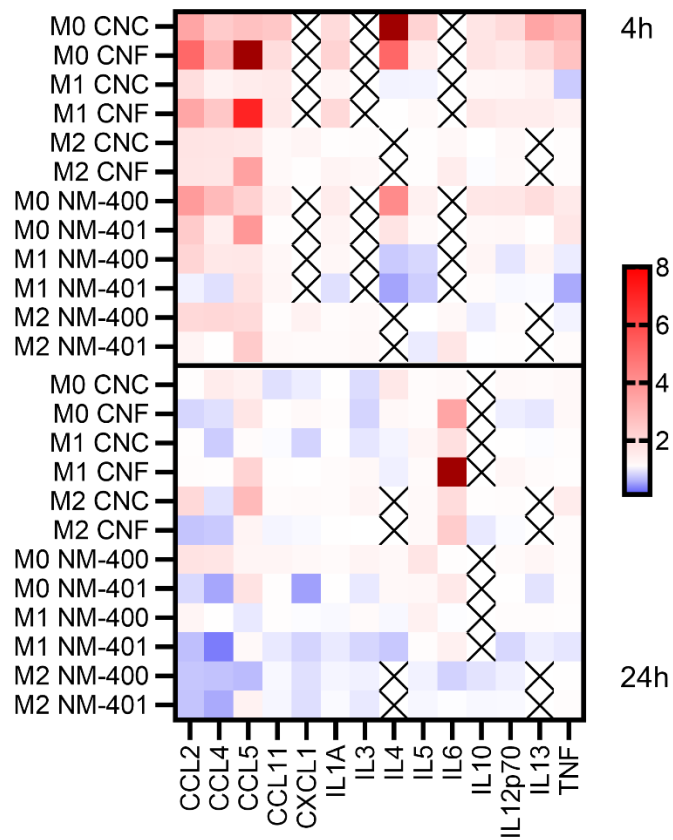

**Supplementary Figure 4.** Changes in secreted cytokine and chemokine levels following nanoparticle exposure to CNC, CNF, NM-400 and NM-401 (high C2 dose) in unpolarized (M0), M1 and M2 macrophages. Data indicate average fold change values of proteins expressed in more than one cell type. Fold changes >8 are indicated in dark red, (n=4).

**Supplementary Table 1.** Primer sequences.

| Gene name    | Forward               | Reverse                |
|--------------|-----------------------|------------------------|
| <i>Ubc</i>   | GAGACGATGCAGATCTTTG   | ATGTTGTAGTCTGACAGGG    |
| <i>Hprt</i>  | AGGGATTTGAATCACGTTTG  | TTTACTGGCAACATCAACAG   |
| <i>Cxcl9</i> | GAGGAACCCCTAGTGATAAGG | GTTTGATCTCCGTTCTTCAG   |
| <i>Il6</i>   | AAGAAATGATGGATGCTACC  | GAGTTTCTGTATCTCTCTGAAG |
| <i>Ear11</i> | CAAAGCAGACTGGGAAAC    | GGGGATAGGCTCTGTTATAG   |
| <i>Mrc1</i>  | ATATGAGCCAAATGATGAGC  | CATCCTTGCCTTTCATAACC   |

**Supplementary Table 2.** Effects of nanoparticle exposure on the expression of classical M1 and M2 markers. C1: 0.15  $\mu\text{g}/\text{cm}^2$  and C2: 2.7  $\mu\text{g}/\text{cm}^2$ . Significant fold changes ( $\geq 1.5$  or  $\leq 0.67$ ,  $p < 0.05$ ) are indicated in bold, (n=5).

| Gene symbol   | Cell | Treatment | Fold changes (mean $\pm$ SD)    | Adj.p-value   |
|---------------|------|-----------|---------------------------------|---------------|
| <i>Arg1</i>   | M0   | CNC C1    | 1.03 $\pm$ 0.23                 | 0.9600        |
| <i>Arg1</i>   | M0   | CNC C2    | 0.98 $\pm$ 0.16                 | 0.9400        |
| <i>Arg1</i>   | M0   | CNF C1    | 1.24 $\pm$ 0.23                 | 0.5100        |
| <i>Arg1</i>   | M0   | CNF C2    | 1.39 $\pm$ 0.24                 | 0.2400        |
| <i>Arg1</i>   | M0   | NM-400 C1 | 0.97 $\pm$ 0.26                 | 0.9100        |
| <i>Arg1</i>   | M0   | NM-400 C2 | 0.90 $\pm$ 0.13                 | 0.8300        |
| <i>Arg1</i>   | M0   | NM-401 C1 | 1.27 $\pm$ 0.15                 | 0.5800        |
| <i>Arg1</i>   | M0   | NM-401 C2 | 1.32 $\pm$ 0.32                 | 0.4600        |
| <i>Arg1</i>   | M1   | CNC C1    | 0.89 $\pm$ 0.09                 | 0.7200        |
| <i>Arg1</i>   | M1   | CNC C2    | 0.90 $\pm$ 0.12                 | 0.7600        |
| <i>Arg1</i>   | M1   | CNF C1    | 1.11 $\pm$ 0.12                 | 0.8300        |
| <i>Arg1</i>   | M1   | CNF C2    | 1.10 $\pm$ 0.10                 | 0.8600        |
| <i>Arg1</i>   | M1   | NM-400 C1 | 0.77 $\pm$ 0.17                 | 0.5800        |
| <i>Arg1</i>   | M1   | NM-400 C2 | 0.78 $\pm$ 0.25                 | 0.5100        |
| <i>Arg1</i>   | M1   | NM-401 C1 | 1.04 $\pm$ 0.14                 | 0.9400        |
| <i>Arg1</i>   | M1   | NM-401 C2 | 1.15 $\pm$ 0.33                 | 0.7000        |
| <i>Arg1</i>   | M2   | CNC C1    | 1.26 $\pm$ 0.36                 | 0.5300        |
| <i>Arg1</i>   | M2   | CNC C2    | 0.92 $\pm$ 0.14                 | 0.7800        |
| <i>Arg1</i>   | M2   | CNF C1    | 1.40 $\pm$ 0.78                 | 0.3000        |
| <i>Arg1</i>   | M2   | CNF C2    | <b>1.84<math>\pm</math>1.45</b> | <b>0.0160</b> |
| <i>Arg1</i>   | M2   | NM-400 C1 | 1.52 $\pm$ 0.58                 | 0.2100        |
| <i>Arg1</i>   | M2   | NM-400 C2 | 1.60 $\pm$ 0.63                 | 0.1100        |
| <i>Arg1</i>   | M2   | NM-401 C1 | <b>2.49<math>\pm</math>0.95</b> | <b>0.0001</b> |
| <i>Arg1</i>   | M2   | NM-401 C2 | <b>2.16<math>\pm</math>0.69</b> | <b>0.0007</b> |
| <i>Cxcl10</i> | M0   | CNC C1    | 0.96 $\pm$ 0.22                 | 0.7500        |
| <i>Cxcl10</i> | M0   | CNC C2    | 1.19 $\pm$ 0.14                 | 0.6800        |
| <i>Cxcl10</i> | M0   | CNF C1    | 0.59 $\pm$ 0.06                 | 0.0720        |
| <i>Cxcl10</i> | M0   | CNF C2    | 1.11 $\pm$ 0.35                 | 0.7800        |
| <i>Cxcl10</i> | M0   | NM-400 C1 | <b>0.41<math>\pm</math>0.08</b> | <b>0.0120</b> |
| <i>Cxcl10</i> | M0   | NM-400 C2 | 0.74 $\pm$ 0.18                 | 0.2100        |

|               |    |           |                  |               |
|---------------|----|-----------|------------------|---------------|
| <i>Cxcl10</i> | M0 | NM-401 C1 | 0.84±0.25        | 0.4300        |
| <i>Cxcl10</i> | M0 | NM-401 C2 | 0.95±0.07        | 0.7500        |
| <i>Cxcl10</i> | M1 | CNC C1    | 1.06±0.22        | 0.9500        |
| <i>Cxcl10</i> | M1 | CNC C2    | 1.18±0.10        | 0.6000        |
| <i>Cxcl10</i> | M1 | CNF C1    | 0.82±0.31        | 0.3200        |
| <i>Cxcl10</i> | M1 | CNF C2    | 1.74±0.20        | 0.0110        |
| <i>Cxcl10</i> | M1 | NM-400 C1 | <b>0.53±0.13</b> | <b>0.0400</b> |
| <i>Cxcl10</i> | M1 | NM-400 C2 | 0.62±0.15        | 0.0800        |
| <i>Cxcl10</i> | M1 | NM-401 C1 | 0.94±0.11        | 0.6900        |
| <i>Cxcl10</i> | M1 | NM-401 C2 | 1.12±0.27        | 0.9300        |
| <i>Cxcl10</i> | M2 | CNC C1    | 1.26±0.22        | 0.7500        |
| <i>Cxcl10</i> | M2 | CNC C2    | 1.59±0.64        | 0.0900        |
| <i>Cxcl10</i> | M2 | CNF C1    | 0.73±0.27        | 0.0910        |
| <i>Cxcl10</i> | M2 | CNF C2    | 1.21±0.42        | 0.6700        |
| <i>Cxcl10</i> | M2 | NM-400 C1 | <b>0.50±0.13</b> | <b>0.0160</b> |
| <i>Cxcl10</i> | M2 | NM-400 C2 | 0.70±0.03        | 0.0850        |
| <i>Cxcl10</i> | M2 | NM-401 C1 | 0.79±0.14        | 0.2100        |
| <i>Cxcl10</i> | M2 | NM-401 C2 | 1.16±0.36        | 0.9200        |
| <i>Cxcl9</i>  | M0 | CNC C1    | 0.86±0.46        | 0.5700        |
| <i>Cxcl9</i>  | M0 | CNC C2    | 1.01±0.16        | 0.9000        |
| <i>Cxcl9</i>  | M0 | CNF C1    | 0.81±0.22        | 0.6300        |
| <i>Cxcl9</i>  | M0 | CNF C2    | 1.12±0.55        | 0.8600        |
| <i>Cxcl9</i>  | M0 | NM-400 C1 | 0.96±0.24        | 0.9000        |
| <i>Cxcl9</i>  | M0 | NM-400 C2 | 0.85±0.19        | 0.7000        |
| <i>Cxcl9</i>  | M0 | NM-401 C1 | 0.76±0.17        | 0.6000        |
| <i>Cxcl9</i>  | M0 | NM-401 C2 | 0.97±0.41        | 0.8300        |
| <i>Cxcl9</i>  | M1 | CNC C1    | 0.96±0.49        | 0.8600        |
| <i>Cxcl9</i>  | M1 | CNC C2    | 1.24±0.30        | 0.6400        |
| <i>Cxcl9</i>  | M1 | CNF C1    | 0.84±0.40        | 0.6300        |
| <i>Cxcl9</i>  | M1 | CNF C2    | <b>4.07±0.64</b> | <b>0.0000</b> |
| <i>Cxcl9</i>  | M1 | NM-400 C1 | 0.48±0.15        | 0.1400        |
| <i>Cxcl9</i>  | M1 | NM-400 C2 | 0.77±0.41        | 0.5200        |
| <i>Cxcl9</i>  | M1 | NM-401 C1 | 1.12±0.41        | 0.8500        |
| <i>Cxcl9</i>  | M1 | NM-401 C2 | 1.22±0.55        | 0.6500        |
| <i>Cxcl9</i>  | M2 | CNC C1    | 1.57±0.61        | 0.2700        |
| <i>Cxcl9</i>  | M2 | CNC C2    | 1.27±0.25        | 0.7700        |
| <i>Cxcl9</i>  | M2 | CNF C1    | 1.55±0.70        | 0.3300        |
| <i>Cxcl9</i>  | M2 | CNF C2    | 1.33±0.30        | 0.7000        |
| <i>Cxcl9</i>  | M2 | NM-400 C1 | 1.57±0.44        | 0.3400        |
| <i>Cxcl9</i>  | M2 | NM-400 C2 | 1.18±0.11        | 0.9900        |
| <i>Cxcl9</i>  | M2 | NM-401 C1 | 1.41±0.44        | 0.5300        |
| <i>Cxcl9</i>  | M2 | NM-401 C2 | 1.62±0.53        | 0.2100        |
| <i>Ear11</i>  | M0 | CNC C1    | 0.96±0.28        | 0.9600        |
| <i>Ear11</i>  | M0 | CNC C2    | 1.24±0.40        | 0.7300        |
| <i>Ear11</i>  | M0 | CNF C1    | 0.93±0.10        | 0.9200        |
| <i>Ear11</i>  | M0 | CNF C2    | 1.40±0.42        | 0.4900        |

|              |    |           |                  |               |
|--------------|----|-----------|------------------|---------------|
| <i>Ear11</i> | M0 | NM-400 C1 | 1.69±0.38        | 0.2100        |
| <i>Ear11</i> | M0 | NM-400 C2 | 1.09±0.27        | 0.8800        |
| <i>Ear11</i> | M0 | NM-401 C1 | 0.91±0.28        | 0.8800        |
| <i>Ear11</i> | M0 | NM-401 C2 | 1.81±0.41        | 0.1800        |
| <i>Ear11</i> | M1 | CNC C1    | 1.29±0.81        | 0.8800        |
| <i>Ear11</i> | M1 | CNC C2    | 1.12±0.19        | 0.9000        |
| <i>Ear11</i> | M1 | CNF C1    | 1.49±0.73        | 0.6200        |
| <i>Ear11</i> | M1 | CNF C2    | 1.78±0.79        | 0.3400        |
| <i>Ear11</i> | M1 | NM-400 C1 | 1.28±0.38        | 0.9800        |
| <i>Ear11</i> | M1 | NM-400 C2 | 1.58±0.48        | 0.6500        |
| <i>Ear11</i> | M1 | NM-401 C1 | 0.95±0.24        | 0.7200        |
| <i>Ear11</i> | M1 | NM-401 C2 | 1.45±0.74        | 0.6500        |
| <i>Ear11</i> | M2 | CNC C1    | 1.56±0.27        | 0.3900        |
| <i>Ear11</i> | M2 | CNC C2    | 1.77±0.62        | 0.1900        |
| <i>Ear11</i> | M2 | CNF C1    | <b>2.31±0.90</b> | <b>0.0180</b> |
| <i>Ear11</i> | M2 | CNF C2    | 1.79±0.20        | 0.2000        |
| <i>Ear11</i> | M2 | NM-400 C1 | <b>3.42±0.73</b> | <b>0.0000</b> |
| <i>Ear11</i> | M2 | NM-400 C2 | <b>3.14±1.64</b> | <b>0.0001</b> |
| <i>Ear11</i> | M2 | NM-401 C1 | <b>3.98±0.95</b> | <b>0.0000</b> |
| <i>Ear11</i> | M2 | NM-401 C2 | <b>3.35±0.94</b> | <b>0.0000</b> |
| <i>Il6</i>   | M0 | CNC C1    | 0.84±0.57        | 0.5700        |
| <i>Il6</i>   | M0 | CNC C2    | 1.16±1.58        | 0.7600        |
| <i>Il6</i>   | M0 | CNF C1    | 0.98±0.17        | 0.7200        |
| <i>Il6</i>   | M0 | CNF C2    | 1.64±0.43        | 0.8800        |
| <i>Il6</i>   | M0 | NM-400 C1 | 0.53±0.35        | 0.3400        |
| <i>Il6</i>   | M0 | NM-400 C2 | 0.99±0.95        | 0.6500        |
| <i>Il6</i>   | M0 | NM-401 C1 | 0.85±0.55        | 0.8300        |
| <i>Il6</i>   | M0 | NM-401 C2 | 1.73±0.83        | 0.6900        |
| <i>Il6</i>   | M1 | CNC C1    | 0.76±0.19        | 0.7200        |
| <i>Il6</i>   | M1 | CNC C2    | 1.17±1.11        | 0.9900        |
| <i>Il6</i>   | M1 | CNF C1    | 1.54±1.92        | 0.7000        |
| <i>Il6</i>   | M1 | CNF C2    | <b>7.66±2.49</b> | <b>0.0000</b> |
| <i>Il6</i>   | M1 | NM-400 C1 | 0.35±0.08        | 0.3600        |
| <i>Il6</i>   | M1 | NM-400 C2 | 1.11±0.78        | 0.9100        |
| <i>Il6</i>   | M1 | NM-401 C1 | 0.61±0.33        | 0.7600        |
| <i>Il6</i>   | M1 | NM-401 C2 | 1.81±1.98        | 0.3600        |
| <i>Il6</i>   | M2 | CNC C1    | 0.43±0.31        | 0.5400        |
| <i>Il6</i>   | M2 | CNC C2    | 0.57±0.40        | 0.7500        |
| <i>Il6</i>   | M2 | CNF C1    | 1.27±0.34        | 0.8700        |
| <i>Il6</i>   | M2 | CNF C2    | 1.36±0.63        | 0.7200        |
| <i>Il6</i>   | M2 | NM-400 C1 | 1.61±1.44        | 0.5000        |
| <i>Il6</i>   | M2 | NM-400 C2 | 1.17±1.14        | 0.8000        |
| <i>Il6</i>   | M2 | NM-401 C1 | 1.83±1.06        | 0.2700        |
| <i>Il6</i>   | M2 | NM-401 C2 | 1.30±0.49        | 0.6500        |
| <i>Mrc1</i>  | M0 | CNC C1    | 0.71±0.20        | 0.4500        |
| <i>Mrc1</i>  | M0 | CNC C2    | 0.77±0.21        | 0.5300        |

|             |    |           |                  |               |
|-------------|----|-----------|------------------|---------------|
| <i>Mrc1</i> | M0 | CNF C1    | 1.46±0.87        | 0.4800        |
| <i>Mrc1</i> | M0 | CNF C2    | 0.60±0.23        | 0.3600        |
| <i>Mrc1</i> | M0 | NM-400 C1 | <b>2.35±0.39</b> | <b>0.0096</b> |
| <i>Mrc1</i> | M0 | NM-400 C2 | 0.57±0.21        | 0.3200        |
| <i>Mrc1</i> | M0 | NM-401 C1 | 2.04±0.61        | 0.0990        |
| <i>Mrc1</i> | M0 | NM-401 C2 | 2.13±0.55        | 0.0770        |
| <i>Mrc1</i> | M1 | CNC C1    | 1.46±0.75        | 0.3800        |
| <i>Mrc1</i> | M1 | CNC C2    | 1.08±0.22        | 0.8900        |
| <i>Mrc1</i> | M1 | CNF C1    | 1.20±0.36        | 0.8500        |
| <i>Mrc1</i> | M1 | CNF C2    | 1.70±0.91        | 0.1600        |
| <i>Mrc1</i> | M1 | NM-400 C1 | 1.28±0.76        | 0.6500        |
| <i>Mrc1</i> | M1 | NM-400 C2 | 1.09±0.14        | 0.9100        |
| <i>Mrc1</i> | M1 | NM-401 C1 | 1.37±0.47        | 0.6300        |
| <i>Mrc1</i> | M1 | NM-401 C2 | 1.36±0.69        | 0.6200        |
| <i>Mrc1</i> | M2 | CNC C1    | 1.30±0.69        | 0.7100        |
| <i>Mrc1</i> | M2 | CNC C2    | 1.65±0.53        | 0.2700        |
| <i>Mrc1</i> | M2 | CNF C1    | 1.90±1.05        | 0.1200        |
| <i>Mrc1</i> | M2 | CNF C2    | 1.08±1.05        | 0.9900        |
| <i>Mrc1</i> | M2 | NM-400 C1 | 1.86±0.73        | 0.1200        |
| <i>Mrc1</i> | M2 | NM-400 C2 | <b>2.06±0.84</b> | <b>0.0460</b> |
| <i>Mrc1</i> | M2 | NM-401 C1 | <b>3.65±0.96</b> | <b>0.0000</b> |
| <i>Mrc1</i> | M2 | NM-401 C2 | <b>4.50±0.66</b> | <b>0.0000</b> |
| <i>Nos2</i> | M0 | CNC C1    | 0.95±0.23        | 0.7800        |
| <i>Nos2</i> | M0 | CNC C2    | 1.20±0.88        | 0.9500        |
| <i>Nos2</i> | M0 | CNF C1    | 0.69±0.06        | 0.4300        |
| <i>Nos2</i> | M0 | CNF C2    | 1.48±0.69        | 0.3500        |
| <i>Nos2</i> | M0 | NM-400 C1 | 0.67±0.23        | 0.4500        |
| <i>Nos2</i> | M0 | NM-400 C2 | 0.69±0.26        | 0.4900        |
| <i>Nos2</i> | M0 | NM-401 C1 | 0.84±0.12        | 0.7500        |
| <i>Nos2</i> | M0 | NM-401 C2 | 1.73±0.64        | 0.2000        |
| <i>Nos2</i> | M1 | CNC C1    | 1.16±0.12        | 0.8400        |
| <i>Nos2</i> | M1 | CNC C2    | 1.41±0.19        | 0.4900        |
| <i>Nos2</i> | M1 | CNF C1    | 1.17±0.53        | 0.8100        |
| <i>Nos2</i> | M1 | CNF C2    | <b>2.64±0.58</b> | <b>0.0008</b> |
| <i>Nos2</i> | M1 | NM-400 C1 | 0.70±0.03        | 0.5500        |
| <i>Nos2</i> | M1 | NM-400 C2 | 0.88±0.16        | 0.7100        |
| <i>Nos2</i> | M1 | NM-401 C1 | 0.74±0.18        | 0.7000        |
| <i>Nos2</i> | M1 | NM-401 C2 | 1.16±0.38        | 0.6700        |
| <i>Nos2</i> | M2 | CNC C1    | 1.01±0.38        | 0.7200        |
| <i>Nos2</i> | M2 | CNC C2    | 1.57±1.04        | 0.3400        |
| <i>Nos2</i> | M2 | CNF C1    | 1.00±0.42        | 0.6800        |
| <i>Nos2</i> | M2 | CNF C2    | 1.95±1.07        | 0.0600        |
| <i>Nos2</i> | M2 | NM-400 C1 | 0.72±0.34        | 0.3400        |
| <i>Nos2</i> | M2 | NM-400 C2 | 0.69±0.22        | 0.3000        |
| <i>Nos2</i> | M2 | NM-401 C1 | 0.73±0.13        | 0.4500        |
| <i>Nos2</i> | M2 | NM-401 C2 | 0.70±0.34        | 0.4500        |



**Supplementary Table 3.** Effects on the expression of genes regulating epigenetic modifications following exposure to CNC, CNF, NM-400 and NM-401. C1: 0.15  $\mu\text{g}/\text{cm}^2$  and C2: 2.7  $\mu\text{g}/\text{cm}^2$ . Significant fold changes ( $\geq 1.5$  or  $\leq 0.67$ ,  $p < 0.05$ ) are indicated in bold, (n=5).

| Gene symbol  | Cell | Treatment | Fold changes (mean $\pm$ SD)    | Adj.p-value   |
|--------------|------|-----------|---------------------------------|---------------|
| <i>Ash1l</i> | M0   | CNC C1    | 0.85 $\pm$ 0.21                 | 0.2600        |
| <i>Ash1l</i> | M0   | CNC C2    | 1.02 $\pm$ 0.09                 | 0.6400        |
| <i>Ash1l</i> | M0   | CNF C1    | 1.20 $\pm$ 0.07                 | 0.0130        |
| <i>Ash1l</i> | M0   | CNF C2    | 1.13 $\pm$ 0.13                 | 0.0870        |
| <i>Ash1l</i> | M0   | NM-400 C1 | 1.16 $\pm$ 0.21                 | 0.0770        |
| <i>Ash1l</i> | M0   | NM-400 C2 | 0.98 $\pm$ 0.09                 | 0.8300        |
| <i>Ash1l</i> | M0   | NM-401 C1 | 1.19 $\pm$ 0.04                 | 0.0350        |
| <i>Ash1l</i> | M0   | NM-401 C2 | 1.19 $\pm$ 0.11                 | 0.0280        |
| <i>Ash1l</i> | M1   | CNC C1    | 1.02 $\pm$ 0.09                 | 0.9000        |
| <i>Ash1l</i> | M1   | CNC C2    | 0.96 $\pm$ 0.05                 | 0.6800        |
| <i>Ash1l</i> | M1   | CNF C1    | 1.17 $\pm$ 0.13                 | 0.0870        |
| <i>Ash1l</i> | M1   | CNF C2    | 1.06 $\pm$ 0.09                 | 0.6100        |
| <i>Ash1l</i> | M1   | NM-400 C1 | 0.95 $\pm$ 0.03                 | 0.6900        |
| <i>Ash1l</i> | M1   | NM-400 C2 | 0.95 $\pm$ 0.10                 | 0.6600        |
| <i>Ash1l</i> | M1   | NM-401 C1 | 1.11 $\pm$ 0.01                 | 0.3600        |
| <i>Ash1l</i> | M1   | NM-401 C2 | 1.01 $\pm$ 0.11                 | 0.9300        |
| <i>Ash1l</i> | M2   | CNC C1    | 1.07 $\pm$ 0.11                 | 0.5300        |
| <i>Ash1l</i> | M2   | CNC C2    | 1.05 $\pm$ 0.18                 | 0.6700        |
| <i>Ash1l</i> | M2   | CNF C1    | 1.28 $\pm$ 0.16                 | 0.0026        |
| <i>Ash1l</i> | M2   | CNF C2    | 1.31 $\pm$ 0.18                 | 0.0008        |
| <i>Ash1l</i> | M2   | NM-400 C1 | 1.03 $\pm$ 0.10                 | 0.8800        |
| <i>Ash1l</i> | M2   | NM-400 C2 | 0.84 $\pm$ 0.10                 | 0.0950        |
| <i>Ash1l</i> | M2   | NM-401 C1 | 1.10 $\pm$ 0.06                 | 0.4700        |
| <i>Ash1l</i> | M2   | NM-401 C2 | 0.71 $\pm$ 0.19                 | 0.0022        |
| <i>Dnmt1</i> | M0   | CNC C1    | 0.71 $\pm$ 0.19                 | 0.2400        |
| <i>Dnmt1</i> | M0   | CNC C2    | 0.71 $\pm$ 0.05                 | 0.2400        |
| <i>Dnmt1</i> | M0   | CNF C1    | 0.78 $\pm$ 0.07                 | 0.4700        |
| <i>Dnmt1</i> | M0   | CNF C2    | 0.77 $\pm$ 0.14                 | 0.4400        |
| <i>Dnmt1</i> | M0   | NM-400 C1 | 1.22 $\pm$ 0.18                 | 0.2100        |
| <i>Dnmt1</i> | M0   | NM-400 C2 | 1.24 $\pm$ 0.21                 | 0.1300        |
| <i>Dnmt1</i> | M0   | NM-401 C1 | <b>1.50<math>\pm</math>0.07</b> | <b>0.0035</b> |
| <i>Dnmt1</i> | M0   | NM-401 C2 | 1.34 $\pm$ 0.11                 | 0.0230        |
| <i>Dnmt1</i> | M1   | CNC C1    | 0.83 $\pm$ 0.10                 | 0.6900        |
| <i>Dnmt1</i> | M1   | CNC C2    | 0.77 $\pm$ 0.04                 | 0.4700        |
| <i>Dnmt1</i> | M1   | CNF C1    | 0.83 $\pm$ 0.10                 | 0.6900        |
| <i>Dnmt1</i> | M1   | CNF C2    | 0.76 $\pm$ 0.13                 | 0.4500        |
| <i>Dnmt1</i> | M1   | NM-400 C1 | 0.98 $\pm$ 0.02                 | 0.8200        |
| <i>Dnmt1</i> | M1   | NM-400 C2 | 1.08 $\pm$ 0.03                 | 0.5300        |
| <i>Dnmt1</i> | M1   | NM-401 C1 | <b>1.52<math>\pm</math>0.16</b> | <b>0.0025</b> |
| <i>Dnmt1</i> | M1   | NM-401 C2 | <b>1.56<math>\pm</math>0.21</b> | <b>0.0007</b> |
| <i>Dnmt1</i> | M2   | CNC C1    | 0.94 $\pm$ 0.39                 | 0.6400        |
| <i>Dnmt1</i> | M2   | CNC C2    | 1.02 $\pm$ 0.47                 | 0.9300        |

|               |    |           |                  |               |
|---------------|----|-----------|------------------|---------------|
| <i>Dnmt1</i>  | M2 | CNF C1    | 1.14±0.57        | 0.6900        |
| <i>Dnmt1</i>  | M2 | CNF C2    | 1.06±0.48        | 0.9500        |
| <i>Dnmt1</i>  | M2 | NM-400 C1 | 0.95±0.12        | 0.6600        |
| <i>Dnmt1</i>  | M2 | NM-400 C2 | 0.91±0.08        | 0.5300        |
| <i>Dnmt1</i>  | M2 | NM-401 C1 | 1.48±0.03        | 0.0320        |
| <i>Dnmt1</i>  | M2 | NM-401 C2 | <b>1.85±0.25</b> | <b>0.0000</b> |
| <i>Dnmt3a</i> | M0 | CNC C1    | 1.37±0.21        | 0.0003        |
| <i>Dnmt3a</i> | M0 | CNC C2    | 1.24±0.07        | 0.0300        |
| <i>Dnmt3a</i> | M0 | CNF C1    | 1.20±0.10        | 0.0970        |
| <i>Dnmt3a</i> | M0 | CNF C2    | 0.94±0.11        | 0.3600        |
| <i>Dnmt3a</i> | M0 | NM-400 C1 | 0.84±0.01        | 0.1000        |
| <i>Dnmt3a</i> | M0 | NM-400 C2 | 0.89±0.10        | 0.2100        |
| <i>Dnmt3a</i> | M0 | NM-401 C1 | 0.77±0.06        | 0.0180        |
| <i>Dnmt3a</i> | M0 | NM-401 C2 | 0.76±0.06        | 0.0081        |
| <i>Dnmt3a</i> | M1 | CNC C1    | 1.09±0.03        | 0.4600        |
| <i>Dnmt3a</i> | M1 | CNC C2    | 1.10±0.11        | 0.3500        |
| <i>Dnmt3a</i> | M1 | CNF C1    | 1.00±0.13        | 0.8800        |
| <i>Dnmt3a</i> | M1 | CNF C2    | 0.94±0.20        | 0.4500        |
| <i>Dnmt3a</i> | M1 | NM-400 C1 | 0.76±0.05        | 0.0200        |
| <i>Dnmt3a</i> | M1 | NM-400 C2 | 0.76±0.04        | 0.0130        |
| <i>Dnmt3a</i> | M1 | NM-401 C1 | 0.70±0.03        | 0.0031        |
| <i>Dnmt3a</i> | M1 | NM-401 C2 | 0.72±0.06        | 0.0024        |
| <i>Dnmt3a</i> | M2 | CNC C1    | 1.18±0.13        | 0.1000        |
| <i>Dnmt3a</i> | M2 | CNC C2    | 1.16±0.18        | 0.1700        |
| <i>Dnmt3a</i> | M2 | CNF C1    | 1.04±0.08        | 0.7800        |
| <i>Dnmt3a</i> | M2 | CNF C2    | 1.03±0.08        | 0.9100        |
| <i>Dnmt3a</i> | M2 | NM-400 C1 | 0.76±0.03        | 0.0160        |
| <i>Dnmt3a</i> | M2 | NM-400 C2 | 0.94±0.04        | 0.4400        |
| <i>Dnmt3a</i> | M2 | NM-401 C1 | 0.71±0.11        | 0.0028        |
| <i>Dnmt3a</i> | M2 | NM-401 C2 | <b>0.56±0.03</b> | <b>0.0000</b> |
| <i>Dnmt3b</i> | M0 | CNC C1    | 1.46±0.12        | 0.0140        |
| <i>Dnmt3b</i> | M0 | CNC C2    | 1.12±0.06        | 0.8900        |
| <i>Dnmt3b</i> | M0 | CNF C1    | 1.33±0.14        | 0.2100        |
| <i>Dnmt3b</i> | M0 | CNF C2    | 1.19±0.22        | 0.8800        |
| <i>Dnmt3b</i> | M0 | NM-400 C1 | <b>0.64±0.18</b> | <b>0.0003</b> |
| <i>Dnmt3b</i> | M0 | NM-400 C2 | <b>0.66±0.08</b> | <b>0.0002</b> |
| <i>Dnmt3b</i> | M0 | NM-401 C1 | <b>0.63±0.04</b> | <b>0.0003</b> |
| <i>Dnmt3b</i> | M0 | NM-401 C2 | <b>0.62±0.09</b> | <b>0.0001</b> |
| <i>Dnmt3b</i> | M1 | CNC C1    | 1.16±0.14        | 0.3000        |
| <i>Dnmt3b</i> | M1 | CNC C2    | 1.12±0.21        | 0.4700        |
| <i>Dnmt3b</i> | M1 | CNF C1    | 1.02±0.16        | 0.9900        |
| <i>Dnmt3b</i> | M1 | CNF C2    | 1.04±0.15        | 0.9100        |
| <i>Dnmt3b</i> | M1 | NM-400 C1 | <b>0.60±0.10</b> | <b>0.0019</b> |
| <i>Dnmt3b</i> | M1 | NM-400 C2 | <b>0.58±0.05</b> | <b>0.0006</b> |
| <i>Dnmt3b</i> | M1 | NM-401 C1 | <b>0.62±0.08</b> | <b>0.0034</b> |
| <i>Dnmt3b</i> | M1 | NM-401 C2 | 0.68±0.09        | 0.0059        |

|               |    |           |                  |               |
|---------------|----|-----------|------------------|---------------|
| <i>Dnmt3b</i> | M2 | CNC C1    | 1.10±0.12        | 0.9900        |
| <i>Dnmt3b</i> | M2 | CNC C2    | 0.98±0.08        | 0.4000        |
| <i>Dnmt3b</i> | M2 | CNF C1    | 1.21±0.26        | 0.3500        |
| <i>Dnmt3b</i> | M2 | CNF C2    | 1.10±0.16        | 0.9100        |
| <i>Dnmt3b</i> | M2 | NM-400 C1 | 0.69±0.08        | 0.0031        |
| <i>Dnmt3b</i> | M2 | NM-400 C2 | <b>0.56±0.06</b> | <b>0.0001</b> |
| <i>Dnmt3b</i> | M2 | NM-401 C1 | 0.68±0.05        | 0.0024        |
| <i>Dnmt3b</i> | M2 | NM-401 C2 | <b>0.56±0.08</b> | <b>0.0000</b> |
| <i>Dot1l</i>  | M0 | CNC C1    | 1.24±0.09        | 0.0790        |
| <i>Dot1l</i>  | M0 | CNC C2    | 1.12±0.15        | 0.4700        |
| <i>Dot1l</i>  | M0 | CNF C1    | 1.20±0.12        | 0.1800        |
| <i>Dot1l</i>  | M0 | CNF C2    | 1.09±0.16        | 0.7000        |
| <i>Dot1l</i>  | M0 | NM-400 C1 | 0.84±0.21        | 0.1400        |
| <i>Dot1l</i>  | M0 | NM-400 C2 | 0.90±0.05        | 0.2900        |
| <i>Dot1l</i>  | M0 | NM-401 C1 | 0.76±0.16        | 0.0320        |
| <i>Dot1l</i>  | M0 | NM-401 C2 | 0.72±0.08        | 0.0100        |
| <i>Dot1l</i>  | M1 | CNC C1    | 1.06±0.06        | 0.7300        |
| <i>Dot1l</i>  | M1 | CNC C2    | 1.03±0.08        | 0.8800        |
| <i>Dot1l</i>  | M1 | CNF C1    | 1.02±0.18        | 0.9200        |
| <i>Dot1l</i>  | M1 | CNF C2    | 0.97±0.09        | 0.7800        |
| <i>Dot1l</i>  | M1 | NM-400 C1 | 0.81±0.10        | 0.0930        |
| <i>Dot1l</i>  | M1 | NM-400 C2 | 0.78±0.10        | 0.0360        |
| <i>Dot1l</i>  | M1 | NM-401 C1 | <b>0.67±0.06</b> | <b>0.0041</b> |
| <i>Dot1l</i>  | M1 | NM-401 C2 | 0.71±0.09        | 0.0059        |
| <i>Dot1l</i>  | M2 | CNC C1    | 1.22±0.11        | 0.0930        |
| <i>Dot1l</i>  | M2 | CNC C2    | 1.14±0.13        | 0.3800        |
| <i>Dot1l</i>  | M2 | CNF C1    | 1.02±0.12        | 0.9800        |
| <i>Dot1l</i>  | M2 | CNF C2    | 1.06±0.14        | 0.7500        |
| <i>Dot1l</i>  | M2 | NM-400 C1 | 0.86±0.10        | 0.2100        |
| <i>Dot1l</i>  | M2 | NM-400 C2 | 0.81±0.04        | 0.0970        |
| <i>Dot1l</i>  | M2 | NM-401 C1 | <b>0.65±0.18</b> | <b>0.0021</b> |
| <i>Dot1l</i>  | M2 | NM-401 C2 | <b>0.51±0.05</b> | <b>0.0000</b> |
| <i>Ezh1</i>   | M0 | CNC C1    | 1.23±0.10        | 0.0110        |
| <i>Ezh1</i>   | M0 | CNC C2    | 0.99±0.11        | 0.4400        |
| <i>Ezh1</i>   | M0 | CNF C1    | 1.10±0.09        | 0.5900        |
| <i>Ezh1</i>   | M0 | CNF C2    | 1.05±0.11        | 0.9800        |
| <i>Ezh1</i>   | M0 | NM-400 C1 | 0.92±0.05        | 0.1200        |
| <i>Ezh1</i>   | M0 | NM-400 C2 | 0.79±0.02        | 0.0004        |
| <i>Ezh1</i>   | M0 | NM-401 C1 | 0.81±0.12        | 0.0022        |
| <i>Ezh1</i>   | M0 | NM-401 C2 | 0.71±0.06        | 0.0000        |
| <i>Ezh1</i>   | M1 | CNC C1    | 1.11±0.05        | 0.1700        |
| <i>Ezh1</i>   | M1 | CNC C2    | 1.02±0.08        | 0.9100        |
| <i>Ezh1</i>   | M1 | CNF C1    | 1.00±0.09        | 0.9400        |
| <i>Ezh1</i>   | M1 | CNF C2    | 1.09±0.13        | 0.2300        |
| <i>Ezh1</i>   | M1 | NM-400 C1 | 0.87±0.04        | 0.0990        |
| <i>Ezh1</i>   | M1 | NM-400 C2 | 0.70±0.07        | 0.0000        |

|              |    |           |                  |               |
|--------------|----|-----------|------------------|---------------|
| <i>Ezh1</i>  | M1 | NM-401 C1 | 0.73±0.07        | 0.0004        |
| <i>Ezh1</i>  | M1 | NM-401 C2 | 0.72±0.02        | 0.0001        |
| <i>Ezh1</i>  | M2 | CNC C1    | 1.03±0.07        | 0.7600        |
| <i>Ezh1</i>  | M2 | CNC C2    | 0.89±0.10        | 0.1400        |
| <i>Ezh1</i>  | M2 | CNF C1    | 0.99±0.10        | 0.9200        |
| <i>Ezh1</i>  | M2 | CNF C2    | 0.91±0.12        | 0.2100        |
| <i>Ezh1</i>  | M2 | NM-400 C1 | 0.89±0.09        | 0.1600        |
| <i>Ezh1</i>  | M2 | NM-400 C2 | 0.83±0.04        | 0.0180        |
| <i>Ezh1</i>  | M2 | NM-401 C1 | 0.85±0.13        | 0.0510        |
| <i>Ezh1</i>  | M2 | NM-401 C2 | <b>0.52±0.05</b> | <b>0.0000</b> |
| <i>Ezh2</i>  | M0 | CNC C1    | 0.90±0.15        | 0.0930        |
| <i>Ezh2</i>  | M0 | CNC C2    | 0.96±0.05        | 0.4900        |
| <i>Ezh2</i>  | M0 | CNF C1    | 0.99±0.07        | 0.8400        |
| <i>Ezh2</i>  | M0 | CNF C2    | 0.93±0.13        | 0.2900        |
| <i>Ezh2</i>  | M0 | NM-400 C1 | 1.18±0.10        | 0.0280        |
| <i>Ezh2</i>  | M0 | NM-400 C2 | 0.99±0.03        | 0.9000        |
| <i>Ezh2</i>  | M0 | NM-401 C1 | 1.25±0.07        | 0.0013        |
| <i>Ezh2</i>  | M0 | NM-401 C2 | 1.15±0.04        | 0.0350        |
| <i>Ezh2</i>  | M1 | CNC C1    | 0.94±0.06        | 0.3900        |
| <i>Ezh2</i>  | M1 | CNC C2    | 0.97±0.03        | 0.6700        |
| <i>Ezh2</i>  | M1 | CNF C1    | 0.92±0.06        | 0.2400        |
| <i>Ezh2</i>  | M1 | CNF C2    | 0.91±0.04        | 0.1500        |
| <i>Ezh2</i>  | M1 | NM-400 C1 | 1.00±0.01        | 0.9900        |
| <i>Ezh2</i>  | M1 | NM-400 C2 | 0.99±0.06        | 0.8400        |
| <i>Ezh2</i>  | M1 | NM-401 C1 | 1.03±0.18        | 0.7800        |
| <i>Ezh2</i>  | M1 | NM-401 C2 | 0.96±0.02        | 0.6800        |
| <i>Ezh2</i>  | M2 | CNC C1    | 1.02±0.08        | 0.4500        |
| <i>Ezh2</i>  | M2 | CNC C2    | 1.04±0.17        | 0.3400        |
| <i>Ezh2</i>  | M2 | CNF C1    | 1.13±0.13        | 0.0170        |
| <i>Ezh2</i>  | M2 | CNF C2    | 1.08±0.10        | 0.0990        |
| <i>Ezh2</i>  | M2 | NM-400 C1 | 1.06±0.02        | 0.3000        |
| <i>Ezh2</i>  | M2 | NM-400 C2 | 0.95±0.04        | 0.8700        |
| <i>Ezh2</i>  | M2 | NM-401 C1 | 1.17±0.04        | 0.0120        |
| <i>Ezh2</i>  | M2 | NM-401 C2 | 0.98±0.07        | 0.8800        |
| <i>Hdac2</i> | M0 | CNC C1    | 1.15±0.07        | 0.0110        |
| <i>Hdac2</i> | M0 | CNC C2    | 1.06±0.10        | 0.3600        |
| <i>Hdac2</i> | M0 | CNF C1    | 1.11±0.06        | 0.0460        |
| <i>Hdac2</i> | M0 | CNF C2    | 1.10±0.10        | 0.0850        |
| <i>Hdac2</i> | M0 | NM-400 C1 | 1.17±0.16        | 0.0096        |
| <i>Hdac2</i> | M0 | NM-400 C2 | 1.06±0.10        | 0.3500        |
| <i>Hdac2</i> | M0 | NM-401 C1 | 1.12±0.03        | 0.0800        |
| <i>Hdac2</i> | M0 | NM-401 C2 | 1.16±0.06        | 0.0096        |
| <i>Hdac2</i> | M1 | CNC C1    | 1.08±0.05        | 0.2100        |
| <i>Hdac2</i> | M1 | CNC C2    | 0.99±0.06        | 0.9100        |
| <i>Hdac2</i> | M1 | CNF C1    | 1.05±0.04        | 0.5700        |
| <i>Hdac2</i> | M1 | CNF C2    | 1.03±0.10        | 0.7600        |

|              |    |           |           |        |
|--------------|----|-----------|-----------|--------|
| <i>Hdac2</i> | M1 | NM-400 C1 | 1.02±0.06 | 0.8600 |
| <i>Hdac2</i> | M1 | NM-400 C2 | 1.01±0.06 | 0.9100 |
| <i>Hdac2</i> | M1 | NM-401 C1 | 1.05±0.02 | 0.4600 |
| <i>Hdac2</i> | M1 | NM-401 C2 | 1.09±0.06 | 0.1500 |
| <i>Hdac2</i> | M2 | CNC C1    | 1.06±0.05 | 0.3800 |
| <i>Hdac2</i> | M2 | CNC C2    | 0.93±0.03 | 0.2600 |
| <i>Hdac2</i> | M2 | CNF C1    | 1.03±0.10 | 0.6900 |
| <i>Hdac2</i> | M2 | CNF C2    | 1.08±0.08 | 0.2100 |
| <i>Hdac2</i> | M2 | NM-400 C1 | 1.07±0.08 | 0.3300 |
| <i>Hdac2</i> | M2 | NM-400 C2 | 1.05±0.05 | 0.5000 |
| <i>Hdac2</i> | M2 | NM-401 C1 | 1.07±0.05 | 0.3500 |
| <i>Hdac2</i> | M2 | NM-401 C2 | 0.96±0.08 | 0.5700 |
| <i>Hdac3</i> | M0 | CNC C1    | 1.15±0.07 | 0.0035 |
| <i>Hdac3</i> | M0 | CNC C2    | 1.06±0.04 | 0.4900 |
| <i>Hdac3</i> | M0 | CNF C1    | 1.11±0.02 | 0.0490 |
| <i>Hdac3</i> | M0 | CNF C2    | 1.12±0.08 | 0.0190 |
| <i>Hdac3</i> | M0 | NM-400 C1 | 0.95±0.03 | 0.2300 |
| <i>Hdac3</i> | M0 | NM-400 C2 | 0.90±0.04 | 0.0150 |
| <i>Hdac3</i> | M0 | NM-401 C1 | 0.88±0.04 | 0.0045 |
| <i>Hdac3</i> | M0 | NM-401 C2 | 0.92±0.05 | 0.0350 |
| <i>Hdac3</i> | M1 | CNC C1    | 1.08±0.05 | 0.1000 |
| <i>Hdac3</i> | M1 | CNC C2    | 1.00±0.03 | 0.9400 |
| <i>Hdac3</i> | M1 | CNF C1    | 1.07±0.04 | 0.1600 |
| <i>Hdac3</i> | M1 | CNF C2    | 1.05±0.05 | 0.3600 |
| <i>Hdac3</i> | M1 | NM-400 C1 | 0.88±0.06 | 0.0240 |
| <i>Hdac3</i> | M1 | NM-400 C2 | 0.84±0.03 | 0.0014 |
| <i>Hdac3</i> | M1 | NM-401 C1 | 0.89±0.04 | 0.0230 |
| <i>Hdac3</i> | M1 | NM-401 C2 | 0.82±0.03 | 0.0002 |
| <i>Hdac3</i> | M2 | CNC C1    | 1.12±0.06 | 0.0120 |
| <i>Hdac3</i> | M2 | CNC C2    | 1.00±0.05 | 0.9100 |
| <i>Hdac3</i> | M2 | CNF C1    | 1.12±0.13 | 0.0150 |
| <i>Hdac3</i> | M2 | CNF C2    | 1.16±0.13 | 0.0014 |
| <i>Hdac3</i> | M2 | NM-400 C1 | 0.91±0.05 | 0.1100 |
| <i>Hdac3</i> | M2 | NM-400 C2 | 0.90±0.07 | 0.0370 |
| <i>Hdac3</i> | M2 | NM-401 C1 | 0.94±0.06 | 0.2100 |
| <i>Hdac3</i> | M2 | NM-401 C2 | 0.75±0.08 | 0.0000 |
| <i>Hdac4</i> | M0 | CNC C1    | 1.33±0.14 | 0.0003 |
| <i>Hdac4</i> | M0 | CNC C2    | 1.18±0.09 | 0.1400 |
| <i>Hdac4</i> | M0 | CNF C1    | 1.23±0.05 | 0.0210 |
| <i>Hdac4</i> | M0 | CNF C2    | 1.14±0.10 | 0.3200 |
| <i>Hdac4</i> | M0 | NM-400 C1 | 0.80±0.07 | 0.0010 |
| <i>Hdac4</i> | M0 | NM-400 C2 | 0.77±0.05 | 0.0002 |
| <i>Hdac4</i> | M0 | NM-401 C1 | 0.79±0.07 | 0.0006 |
| <i>Hdac4</i> | M0 | NM-401 C2 | 0.71±0.07 | 0.0000 |
| <i>Hdac4</i> | M1 | CNC C1    | 1.16±0.06 | 0.0330 |
| <i>Hdac4</i> | M1 | CNC C2    | 1.14±0.02 | 0.0800 |

|              |    |           |                  |               |
|--------------|----|-----------|------------------|---------------|
| <i>Hdac4</i> | M1 | CNF C1    | 1.15±0.03        | 0.0370        |
| <i>Hdac4</i> | M1 | CNF C2    | 1.10±0.07        | 0.2100        |
| <i>Hdac4</i> | M1 | NM-400 C1 | 0.72±0.04        | 0.0005        |
| <i>Hdac4</i> | M1 | NM-400 C2 | 0.69±0.06        | 0.0001        |
| <i>Hdac4</i> | M1 | NM-401 C1 | 0.76±0.12        | 0.0021        |
| <i>Hdac4</i> | M1 | NM-401 C2 | 0.72±0.02        | 0.0001        |
| <i>Hdac4</i> | M2 | CNC C1    | 1.11±0.02        | 0.2100        |
| <i>Hdac4</i> | M2 | CNC C2    | 1.02±0.10        | 0.8500        |
| <i>Hdac4</i> | M2 | CNF C1    | 1.17±0.08        | 0.0290        |
| <i>Hdac4</i> | M2 | CNF C2    | 1.07±0.10        | 0.4600        |
| <i>Hdac4</i> | M2 | NM-400 C1 | 0.84±0.07        | 0.0430        |
| <i>Hdac4</i> | M2 | NM-400 C2 | 0.76±0.04        | 0.0010        |
| <i>Hdac4</i> | M2 | NM-401 C1 | 0.84±0.11        | 0.0370        |
| <i>Hdac4</i> | M2 | NM-401 C2 | <b>0.56±0.07</b> | <b>0.0000</b> |
| <i>Hdac9</i> | M0 | CNC C1    | 0.75±0.21        | 0.4000        |
| <i>Hdac9</i> | M0 | CNC C2    | 0.74±0.20        | 0.3600        |
| <i>Hdac9</i> | M0 | CNF C1    | 0.86±0.14        | 0.7500        |
| <i>Hdac9</i> | M0 | CNF C2    | 0.58±0.13        | 0.0870        |
| <i>Hdac9</i> | M0 | NM-400 C1 | 1.06±0.11        | 0.5900        |
| <i>Hdac9</i> | M0 | NM-400 C2 | 1.07±0.20        | 0.6400        |
| <i>Hdac9</i> | M0 | NM-401 C1 | 1.09±0.32        | 0.5000        |
| <i>Hdac9</i> | M0 | NM-401 C2 | 0.69±0.14        | 0.4000        |
| <i>Hdac9</i> | M1 | CNC C1    | 0.81±0.09        | 0.6400        |
| <i>Hdac9</i> | M1 | CNC C2    | 0.79±0.10        | 0.6000        |
| <i>Hdac9</i> | M1 | CNF C1    | 0.82±0.14        | 0.7700        |
| <i>Hdac9</i> | M1 | CNF C2    | 0.49±0.04        | 0.0510        |
| <i>Hdac9</i> | M1 | NM-400 C1 | 1.09±0.15        | 0.4800        |
| <i>Hdac9</i> | M1 | NM-400 C2 | 0.95±0.22        | 0.8200        |
| <i>Hdac9</i> | M1 | NM-401 C1 | 0.95±0.17        | 0.9100        |
| <i>Hdac9</i> | M1 | NM-401 C2 | 0.69±0.19        | 0.2300        |
| <i>Hdac9</i> | M2 | CNC C1    | 0.96±0.28        | 0.9100        |
| <i>Hdac9</i> | M2 | CNC C2    | 0.96±0.33        | 0.8900        |
| <i>Hdac9</i> | M2 | CNF C1    | 0.81±0.39        | 0.3300        |
| <i>Hdac9</i> | M2 | CNF C2    | 0.76±0.34        | 0.2300        |
| <i>Hdac9</i> | M2 | NM-400 C1 | 0.82±0.12        | 0.4400        |
| <i>Hdac9</i> | M2 | NM-400 C2 | 0.86±0.17        | 0.5700        |
| <i>Hdac9</i> | M2 | NM-401 C1 | 0.86±0.35        | 0.5400        |
| <i>Hdac9</i> | M2 | NM-401 C2 | <b>0.54±0.10</b> | <b>0.0190</b> |
| <i>Kat3a</i> | M0 | CNC C1    | 1.18±0.11        | 0.0280        |
| <i>Kat3a</i> | M0 | CNC C2    | 1.14±0.03        | 0.1300        |
| <i>Kat3a</i> | M0 | CNF C1    | 1.25±0.10        | 0.0018        |
| <i>Kat3a</i> | M0 | CNF C2    | 1.13±0.11        | 0.1900        |
| <i>Kat3a</i> | M0 | NM-400 C1 | 0.95±0.15        | 0.3000        |
| <i>Kat3a</i> | M0 | NM-400 C2 | 0.87±0.06        | 0.0190        |
| <i>Kat3a</i> | M0 | NM-401 C1 | 0.97±0.15        | 0.4300        |
| <i>Kat3a</i> | M0 | NM-401 C2 | 0.92±0.04        | 0.1000        |

|                    |    |           |                  |               |
|--------------------|----|-----------|------------------|---------------|
| <i>Kat3a</i>       | M1 | CNC C1    | 1.09±0.09        | 0.5700        |
| <i>Kat3a</i>       | M1 | CNC C2    | 1.05±0.05        | 0.8800        |
| <i>Kat3a</i>       | M1 | CNF C1    | 1.14±0.06        | 0.1400        |
| <i>Kat3a</i>       | M1 | CNF C2    | 1.08±0.05        | 0.5500        |
| <i>Kat3a</i>       | M1 | NM-400 C1 | 0.90±0.05        | 0.0910        |
| <i>Kat3a</i>       | M1 | NM-400 C2 | 0.78±0.05        | 0.0006        |
| <i>Kat3a</i>       | M1 | NM-401 C1 | 0.85±0.06        | 0.0150        |
| <i>Kat3a</i>       | M1 | NM-401 C2 | 0.80±0.01        | 0.0008        |
| <i>Kat3a</i>       | M2 | CNC C1    | 1.14±0.07        | 0.0510        |
| <i>Kat3a</i>       | M2 | CNC C2    | 1.03±0.08        | 0.7800        |
| <i>Kat3a</i>       | M2 | CNF C1    | 1.19±0.05        | 0.0086        |
| <i>Kat3a</i>       | M2 | CNF C2    | 1.15±0.11        | 0.0430        |
| <i>Kat3a</i>       | M2 | NM-400 C1 | 1.00±0.06        | 1.0000        |
| <i>Kat3a</i>       | M2 | NM-400 C2 | 0.85±0.03        | 0.0290        |
| <i>Kat3a</i>       | M2 | NM-401 C1 | 0.92±0.07        | 0.2900        |
| <i>Kat3a</i>       | M2 | NM-401 C2 | 0.73±0.07        | 0.0001        |
| <i>Kat3b/Ep300</i> | M0 | CNC C1    | 1.28±0.14        | 0.0015        |
| <i>Kat3b/Ep300</i> | M0 | CNC C2    | 1.13±0.11        | 0.3300        |
| <i>Kat3b/Ep300</i> | M0 | CNF C1    | 1.32±0.07        | 0.0001        |
| <i>Kat3b/Ep300</i> | M0 | CNF C2    | 1.18±0.10        | 0.0800        |
| <i>Kat3b/Ep300</i> | M0 | NM-400 C1 | 0.91±0.09        | 0.0970        |
| <i>Kat3b/Ep300</i> | M0 | NM-400 C2 | 0.74±0.07        | 0.0000        |
| <i>Kat3b/Ep300</i> | M0 | NM-401 C1 | 0.88±0.04        | 0.0290        |
| <i>Kat3b/Ep300</i> | M0 | NM-401 C2 | 0.85±0.04        | 0.0070        |
| <i>Kat3b/Ep300</i> | M1 | CNC C1    | 1.15±0.06        | 0.1500        |
| <i>Kat3b/Ep300</i> | M1 | CNC C2    | 1.08±0.07        | 0.6800        |
| <i>Kat3b/Ep300</i> | M1 | CNF C1    | 1.22±0.10        | 0.0099        |
| <i>Kat3b/Ep300</i> | M1 | CNF C2    | 1.17±0.09        | 0.0800        |
| <i>Kat3b/Ep300</i> | M1 | NM-400 C1 | 0.80±0.02        | 0.0022        |
| <i>Kat3b/Ep300</i> | M1 | NM-400 C2 | <b>0.64±0.05</b> | <b>0.0000</b> |
| <i>Kat3b/Ep300</i> | M1 | NM-401 C1 | 0.88±0.01        | 0.0490        |
| <i>Kat3b/Ep300</i> | M1 | NM-401 C2 | 0.72±0.04        | 0.0000        |
| <i>Kat3b/Ep300</i> | M2 | CNC C1    | 1.19±0.03        | 0.0086        |
| <i>Kat3b/Ep300</i> | M2 | CNC C2    | 1.06±0.06        | 0.5300        |
| <i>Kat3b/Ep300</i> | M2 | CNF C1    | 1.30±0.01        | 0.0000        |
| <i>Kat3b/Ep300</i> | M2 | CNF C2    | 1.25±0.06        | 0.0008        |
| <i>Kat3b/Ep300</i> | M2 | NM-400 C1 | 0.87±0.04        | 0.0990        |
| <i>Kat3b/Ep300</i> | M2 | NM-400 C2 | 0.78±0.05        | 0.0019        |
| <i>Kat3b/Ep300</i> | M2 | NM-401 C1 | 0.94±0.07        | 0.4600        |
| <i>Kat3b/Ep300</i> | M2 | NM-401 C2 | <b>0.59±0.07</b> | <b>0.0000</b> |
| <i>Kat5</i>        | M0 | CNC C1    | 1.12±0.06        | 0.1200        |
| <i>Kat5</i>        | M0 | CNC C2    | 1.05±0.09        | 0.6300        |
| <i>Kat5</i>        | M0 | CNF C1    | 1.23±0.05        | 0.0021        |
| <i>Kat5</i>        | M0 | CNF C2    | 1.19±0.05        | 0.0120        |
| <i>Kat5</i>        | M0 | NM-400 C1 | 1.26±0.06        | 0.0020        |
| <i>Kat5</i>        | M0 | NM-400 C2 | 1.11±0.16        | 0.1800        |

|              |    |           |           |        |
|--------------|----|-----------|-----------|--------|
| <i>Kat5</i>  | M0 | NM-401 C1 | 1.19±0.06 | 0.0220 |
| <i>Kat5</i>  | M0 | NM-401 C2 | 1.26±0.17 | 0.0024 |
| <i>Kat5</i>  | M1 | CNC C1    | 1.18±0.09 | 0.0850 |
| <i>Kat5</i>  | M1 | CNC C2    | 1.08±0.04 | 0.7600 |
| <i>Kat5</i>  | M1 | CNF C1    | 1.21±0.07 | 0.0510 |
| <i>Kat5</i>  | M1 | CNF C2    | 1.31±0.09 | 0.0012 |
| <i>Kat5</i>  | M1 | NM-400 C1 | 1.21±0.04 | 0.0540 |
| <i>Kat5</i>  | M1 | NM-400 C2 | 1.12±0.05 | 0.3400 |
| <i>Kat5</i>  | M1 | NM-401 C1 | 1.18±0.06 | 0.1400 |
| <i>Kat5</i>  | M1 | NM-401 C2 | 1.23±0.09 | 0.0190 |
| <i>Kat5</i>  | M2 | CNC C1    | 1.09±0.08 | 0.3000 |
| <i>Kat5</i>  | M2 | CNC C2    | 0.97±0.04 | 0.7200 |
| <i>Kat5</i>  | M2 | CNF C1    | 1.20±0.17 | 0.0120 |
| <i>Kat5</i>  | M2 | CNF C2    | 1.19±0.08 | 0.0150 |
| <i>Kat5</i>  | M2 | NM-400 C1 | 1.33±0.17 | 0.0001 |
| <i>Kat5</i>  | M2 | NM-400 C2 | 1.20±0.08 | 0.0190 |
| <i>Kat5</i>  | M2 | NM-401 C1 | 1.26±0.16 | 0.0016 |
| <i>Kat5</i>  | M2 | NM-401 C2 | 0.89±0.05 | 0.2100 |
| <i>Kat6a</i> | M0 | CNC C1    | 1.08±0.12 | 0.6100 |
| <i>Kat6a</i> | M0 | CNC C2    | 1.07±0.09 | 0.7200 |
| <i>Kat6a</i> | M0 | CNF C1    | 1.20±0.02 | 0.0290 |
| <i>Kat6a</i> | M0 | CNF C2    | 1.18±0.13 | 0.0430 |
| <i>Kat6a</i> | M0 | NM-400 C1 | 1.02±0.20 | 0.8800 |
| <i>Kat6a</i> | M0 | NM-400 C2 | 0.90±0.13 | 0.1000 |
| <i>Kat6a</i> | M0 | NM-401 C1 | 1.03±0.10 | 0.9200 |
| <i>Kat6a</i> | M0 | NM-401 C2 | 0.98±0.06 | 0.4500 |
| <i>Kat6a</i> | M1 | CNC C1    | 1.13±0.07 | 0.1200 |
| <i>Kat6a</i> | M1 | CNC C2    | 1.08±0.04 | 0.4000 |
| <i>Kat6a</i> | M1 | CNF C1    | 1.14±0.10 | 0.0790 |
| <i>Kat6a</i> | M1 | CNF C2    | 1.12±0.05 | 0.1300 |
| <i>Kat6a</i> | M1 | NM-400 C1 | 0.86±0.11 | 0.0900 |
| <i>Kat6a</i> | M1 | NM-400 C2 | 0.78±0.04 | 0.0052 |
| <i>Kat6a</i> | M1 | NM-401 C1 | 0.96±0.05 | 0.6500 |
| <i>Kat6a</i> | M1 | NM-401 C2 | 0.93±0.08 | 0.3500 |
| <i>Kat6a</i> | M2 | CNC C1    | 1.09±0.01 | 0.2100 |
| <i>Kat6a</i> | M2 | CNC C2    | 1.02±0.11 | 0.8100 |
| <i>Kat6a</i> | M2 | CNF C1    | 1.18±0.09 | 0.0190 |
| <i>Kat6a</i> | M2 | CNF C2    | 1.21±0.08 | 0.0049 |
| <i>Kat6a</i> | M2 | NM-400 C1 | 0.97±0.13 | 0.7500 |
| <i>Kat6a</i> | M2 | NM-400 C2 | 0.83±0.08 | 0.0160 |
| <i>Kat6a</i> | M2 | NM-401 C1 | 1.08±0.07 | 0.3400 |
| <i>Kat6a</i> | M2 | NM-401 C2 | 0.81±0.07 | 0.0130 |
| <i>Kat6b</i> | M0 | CNC C1    | 1.18±0.21 | 0.0300 |
| <i>Kat6b</i> | M0 | CNC C2    | 0.99±0.13 | 0.8300 |
| <i>Kat6b</i> | M0 | CNF C1    | 1.20±0.12 | 0.0170 |
| <i>Kat6b</i> | M0 | CNF C2    | 1.02±0.08 | 0.6300 |



|              |    |           |           |        |
|--------------|----|-----------|-----------|--------|
| <i>Kat6b</i> | M0 | NM-400 C1 | 1.13±0.22 | 0.1900 |
| <i>Kat6b</i> | M0 | NM-400 C2 | 0.97±0.15 | 0.9600 |
| <i>Kat6b</i> | M0 | NM-401 C1 | 1.08±0.08 | 0.3800 |
| <i>Kat6b</i> | M0 | NM-401 C2 | 1.01±0.02 | 0.7000 |
| <i>Kat6b</i> | M1 | CNC C1    | 1.02±0.10 | 0.9700 |
| <i>Kat6b</i> | M1 | CNC C2    | 0.99±0.03 | 0.8800 |
| <i>Kat6b</i> | M1 | CNF C1    | 1.09±0.08 | 0.5200 |
| <i>Kat6b</i> | M1 | CNF C2    | 1.03±0.12 | 0.8900 |
| <i>Kat6b</i> | M1 | NM-400 C1 | 0.88±0.05 | 0.3200 |
| <i>Kat6b</i> | M1 | NM-400 C2 | 0.77±0.04 | 0.0220 |
| <i>Kat6b</i> | M1 | NM-401 C1 | 0.92±0.01 | 0.5100 |
| <i>Kat6b</i> | M1 | NM-401 C2 | 0.87±0.11 | 0.2100 |
| <i>Kat6b</i> | M2 | CNC C1    | 1.11±0.17 | 0.1800 |
| <i>Kat6b</i> | M2 | CNC C2    | 0.96±0.18 | 0.9500 |
| <i>Kat6b</i> | M2 | CNF C1    | 1.27±0.23 | 0.0021 |
| <i>Kat6b</i> | M2 | CNF C2    | 1.21±0.24 | 0.0160 |
| <i>Kat6b</i> | M2 | NM-400 C1 | 1.02±0.10 | 0.7600 |
| <i>Kat6b</i> | M2 | NM-400 C2 | 0.84±0.05 | 0.2900 |
| <i>Kat6b</i> | M2 | NM-401 C1 | 1.19±0.10 | 0.0800 |
| <i>Kat6b</i> | M2 | NM-401 C2 | 0.83±0.01 | 0.2100 |
| <i>Kdm1a</i> | M0 | CNC C1    | 0.71±0.25 | 0.2100 |
| <i>Kdm1a</i> | M0 | CNC C2    | 0.75±0.13 | 0.3300 |
| <i>Kdm1a</i> | M0 | CNF C1    | 0.85±0.17 | 0.6500 |
| <i>Kdm1a</i> | M0 | CNF C2    | 0.80±0.16 | 0.4700 |
| <i>Kdm1a</i> | M0 | NM-400 C1 | 1.05±0.12 | 0.5900 |
| <i>Kdm1a</i> | M0 | NM-400 C2 | 0.99±0.08 | 0.7600 |
| <i>Kdm1a</i> | M0 | NM-401 C1 | 1.04±0.01 | 0.4800 |
| <i>Kdm1a</i> | M0 | NM-401 C2 | 1.03±0.11 | 0.5000 |
| <i>Kdm1a</i> | M1 | CNC C1    | 0.82±0.09 | 0.7100 |
| <i>Kdm1a</i> | M1 | CNC C2    | 0.84±0.08 | 0.7800 |
| <i>Kdm1a</i> | M1 | CNF C1    | 0.76±0.15 | 0.4700 |
| <i>Kdm1a</i> | M1 | CNF C2    | 0.78±0.10 | 0.5300 |
| <i>Kdm1a</i> | M1 | NM-400 C1 | 0.78±0.05 | 0.6400 |
| <i>Kdm1a</i> | M1 | NM-400 C2 | 0.83±0.05 | 0.7100 |
| <i>Kdm1a</i> | M1 | NM-401 C1 | 0.91±0.08 | 0.8200 |
| <i>Kdm1a</i> | M1 | NM-401 C2 | 0.88±0.08 | 0.9100 |
| <i>Kdm1a</i> | M2 | CNC C1    | 0.94±0.39 | 0.6500 |
| <i>Kdm1a</i> | M2 | CNC C2    | 1.06±0.56 | 0.9400 |
| <i>Kdm1a</i> | M2 | CNF C1    | 1.06±0.48 | 0.9400 |
| <i>Kdm1a</i> | M2 | CNF C2    | 1.12±0.51 | 0.7000 |
| <i>Kdm1a</i> | M2 | NM-400 C1 | 0.71±0.10 | 0.0950 |
| <i>Kdm1a</i> | M2 | NM-400 C2 | 0.69±0.04 | 0.0540 |
| <i>Kdm1a</i> | M2 | NM-401 C1 | 0.89±0.05 | 0.6200 |
| <i>Kdm1a</i> | M2 | NM-401 C2 | 0.67±0.03 | 0.0870 |
| <i>Kdm6b</i> | M0 | CNC C1    | 1.38±0.11 | 0.0120 |
| <i>Kdm6b</i> | M0 | CNC C2    | 1.19±0.17 | 0.5700 |

|              |    |           |                  |               |
|--------------|----|-----------|------------------|---------------|
| <i>Kdm6b</i> | M0 | CNF C1    | 1.33±0.14        | 0.0460        |
| <i>Kdm6b</i> | M0 | CNF C2    | 1.36±0.13        | 0.0230        |
| <i>Kdm6b</i> | M0 | NM-400 C1 | 0.72±0.06        | 0.0011        |
| <i>Kdm6b</i> | M0 | NM-400 C2 | <b>0.59±0.09</b> | <b>0.0000</b> |
| <i>Kdm6b</i> | M0 | NM-401 C1 | 0.70±0.09        | 0.0006        |
| <i>Kdm6b</i> | M0 | NM-401 C2 | 0.79±0.10        | 0.0032        |
| <i>Kdm6b</i> | M1 | CNC C1    | 1.15±0.14        | 0.5700        |
| <i>Kdm6b</i> | M1 | CNC C2    | 1.17±0.10        | 0.4800        |
| <i>Kdm6b</i> | M1 | CNF C1    | 1.27±0.12        | 0.0800        |
| <i>Kdm6b</i> | M1 | CNF C2    | 1.46±0.20        | 0.0004        |
| <i>Kdm6b</i> | M1 | NM-400 C1 | <b>0.61±0.09</b> | <b>0.0001</b> |
| <i>Kdm6b</i> | M1 | NM-400 C2 | <b>0.66±0.08</b> | <b>0.0002</b> |
| <i>Kdm6b</i> | M1 | NM-401 C1 | 0.80±0.12        | 0.0200        |
| <i>Kdm6b</i> | M1 | NM-401 C2 | 0.90±0.14        | 0.1300        |
| <i>Kdm6b</i> | M2 | CNC C1    | 1.16±0.09        | 0.2400        |
| <i>Kdm6b</i> | M2 | CNC C2    | 1.04±0.07        | 0.8600        |
| <i>Kdm6b</i> | M2 | CNF C1    | 1.26±0.08        | 0.0240        |
| <i>Kdm6b</i> | M2 | CNF C2    | 1.35±0.15        | 0.0015        |
| <i>Kdm6b</i> | M2 | NM-400 C1 | 0.70±0.10        | 0.0076        |
| <i>Kdm6b</i> | M2 | NM-400 C2 | <b>0.61±0.09</b> | <b>0.0002</b> |
| <i>Kdm6b</i> | M2 | NM-401 C1 | 0.85±0.12        | 0.1900        |
| <i>Kdm6b</i> | M2 | NM-401 C2 | <b>0.58±0.05</b> | <b>0.0001</b> |
| <i>Kmt2a</i> | M0 | CNC C1    | 1.43±0.14        | 0.0002        |
| <i>Kmt2a</i> | M0 | CNC C2    | 1.14±0.11        | 0.7500        |
| <i>Kmt2a</i> | M0 | CNF C1    | 1.32±0.09        | 0.0150        |
| <i>Kmt2a</i> | M0 | CNF C2    | 1.24±0.08        | 0.1400        |
| <i>Kmt2a</i> | M0 | NM-400 C1 | 0.76±0.04        | 0.0012        |
| <i>Kmt2a</i> | M0 | NM-400 C2 | <b>0.64±0.06</b> | <b>0.0000</b> |
| <i>Kmt2a</i> | M0 | NM-401 C1 | 0.72±0.02        | 0.0003        |
| <i>Kmt2a</i> | M0 | NM-401 C2 | 0.72±0.04        | 0.0001        |
| <i>Kmt2a</i> | M1 | CNC C1    | 1.13±0.02        | 0.2400        |
| <i>Kmt2a</i> | M1 | CNC C2    | 1.06±0.11        | 0.7000        |
| <i>Kmt2a</i> | M1 | CNF C1    | 1.19±0.06        | 0.0540        |
| <i>Kmt2a</i> | M1 | CNF C2    | 1.12±0.09        | 0.3400        |
| <i>Kmt2a</i> | M1 | NM-400 C1 | <b>0.60±0.06</b> | <b>0.0000</b> |
| <i>Kmt2a</i> | M1 | NM-400 C2 | <b>0.63±0.11</b> | <b>0.0000</b> |
| <i>Kmt2a</i> | M1 | NM-401 C1 | <b>0.61±0.02</b> | <b>0.0001</b> |
| <i>Kmt2a</i> | M1 | NM-401 C2 | <b>0.60±0.05</b> | <b>0.0000</b> |
| <i>Kmt2a</i> | M2 | CNC C1    | 1.23±0.12        | 0.0200        |
| <i>Kmt2a</i> | M2 | CNC C2    | 1.03±0.10        | 0.9300        |
| <i>Kmt2a</i> | M2 | CNF C1    | 1.28±0.10        | 0.0029        |
| <i>Kmt2a</i> | M2 | CNF C2    | 1.26±0.09        | 0.0065        |
| <i>Kmt2a</i> | M2 | NM-400 C1 | <b>0.66±0.02</b> | <b>0.0006</b> |
| <i>Kmt2a</i> | M2 | NM-400 C2 | <b>0.56±0.02</b> | <b>0.0000</b> |
| <i>Kmt2a</i> | M2 | NM-401 C1 | 0.68±0.03        | 0.0010        |
| <i>Kmt2a</i> | M2 | NM-401 C2 | <b>0.50±0.03</b> | <b>0.0000</b> |

|              |    |           |           |        |
|--------------|----|-----------|-----------|--------|
| <i>Prmt1</i> | M0 | CNC C1    | 1.12±0.08 | 0.4600 |
| <i>Prmt1</i> | M0 | CNC C2    | 1.15±0.10 | 0.3300 |
| <i>Prmt1</i> | M0 | CNF C1    | 1.03±0.04 | 0.7800 |
| <i>Prmt1</i> | M0 | CNF C2    | 1.14±0.17 | 0.2300 |
| <i>Prmt1</i> | M0 | NM-400 C1 | 0.89±0.14 | 0.3200 |
| <i>Prmt1</i> | M0 | NM-400 C2 | 0.84±0.12 | 0.1800 |
| <i>Prmt1</i> | M0 | NM-401 C1 | 0.83±0.08 | 0.1200 |
| <i>Prmt1</i> | M0 | NM-401 C2 | 0.92±0.06 | 0.4300 |
| <i>Prmt1</i> | M1 | CNC C1    | 1.18±0.05 | 0.2300 |
| <i>Prmt1</i> | M1 | CNC C2    | 1.17±0.05 | 0.2300 |
| <i>Prmt1</i> | M1 | CNF C1    | 1.14±0.18 | 0.4000 |
| <i>Prmt1</i> | M1 | CNF C2    | 1.24±0.16 | 0.1200 |
| <i>Prmt1</i> | M1 | NM-400 C1 | 0.88±0.13 | 0.2700 |
| <i>Prmt1</i> | M1 | NM-400 C2 | 0.92±0.04 | 0.5000 |
| <i>Prmt1</i> | M1 | NM-401 C1 | 0.89±0.10 | 0.2900 |
| <i>Prmt1</i> | M1 | NM-401 C2 | 0.90±0.07 | 0.3300 |
| <i>Prmt1</i> | M2 | CNC C1    | 1.22±0.07 | 0.1400 |
| <i>Prmt1</i> | M2 | CNC C2    | 1.15±0.10 | 0.3500 |
| <i>Prmt1</i> | M2 | CNF C1    | 1.08±0.21 | 0.8500 |
| <i>Prmt1</i> | M2 | CNF C2    | 1.32±0.25 | 0.0370 |
| <i>Prmt1</i> | M2 | NM-400 C1 | 0.81±0.07 | 0.0910 |
| <i>Prmt1</i> | M2 | NM-400 C2 | 0.84±0.12 | 0.1000 |
| <i>Prmt1</i> | M2 | NM-401 C1 | 0.83±0.04 | 0.1200 |
| <i>Prmt1</i> | M2 | NM-401 C2 | 0.75±0.07 | 0.0320 |
| <i>Setd7</i> | M0 | CNC C1    | 1.08±0.07 | 0.0910 |
| <i>Setd7</i> | M0 | CNC C2    | 1.09±0.11 | 0.0630 |
| <i>Setd7</i> | M0 | CNF C1    | 1.08±0.06 | 0.1000 |
| <i>Setd7</i> | M0 | CNF C2    | 1.12±0.09 | 0.0099 |
| <i>Setd7</i> | M0 | NM-400 C1 | 0.87±0.05 | 0.0200 |
| <i>Setd7</i> | M0 | NM-400 C2 | 0.88±0.03 | 0.0200 |
| <i>Setd7</i> | M0 | NM-401 C1 | 0.89±0.06 | 0.0660 |
| <i>Setd7</i> | M0 | NM-401 C2 | 0.89±0.09 | 0.0460 |
| <i>Setd7</i> | M1 | CNC C1    | 1.06±0.04 | 0.2700 |
| <i>Setd7</i> | M1 | CNC C2    | 1.03±0.07 | 0.5900 |
| <i>Setd7</i> | M1 | CNF C1    | 1.04±0.04 | 0.5200 |
| <i>Setd7</i> | M1 | CNF C2    | 1.09±0.10 | 0.0800 |
| <i>Setd7</i> | M1 | NM-400 C1 | 0.84±0.02 | 0.0030 |
| <i>Setd7</i> | M1 | NM-400 C2 | 0.86±0.05 | 0.0048 |
| <i>Setd7</i> | M1 | NM-401 C1 | 0.87±0.04 | 0.0200 |
| <i>Setd7</i> | M1 | NM-401 C2 | 0.97±0.06 | 0.5700 |
| <i>Setd7</i> | M2 | CNC C1    | 1.06±0.04 | 0.2000 |
| <i>Setd7</i> | M2 | CNC C2    | 1.03±0.03 | 0.6500 |
| <i>Setd7</i> | M2 | CNF C1    | 1.05±0.07 | 0.3800 |
| <i>Setd7</i> | M2 | CNF C2    | 1.13±0.08 | 0.0065 |
| <i>Setd7</i> | M2 | NM-400 C1 | 0.86±0.05 | 0.0150 |
| <i>Setd7</i> | M2 | NM-400 C2 | 0.85±0.03 | 0.0016 |

|              |    |           |                  |               |
|--------------|----|-----------|------------------|---------------|
| <i>Setd7</i> | M2 | NM-401 C1 | 0.88±0.04        | 0.0400        |
| <i>Setd7</i> | M2 | NM-401 C2 | 0.80±0.06        | 0.0001        |
| <i>Sirt1</i> | M0 | CNC C1    | 0.92±0.11        | 0.4000        |
| <i>Sirt1</i> | M0 | CNC C2    | 0.93±0.11        | 0.5100        |
| <i>Sirt1</i> | M0 | CNF C1    | 1.06±0.08        | 0.2400        |
| <i>Sirt1</i> | M0 | CNF C2    | 1.05±0.08        | 0.2600        |
| <i>Sirt1</i> | M0 | NM-400 C1 | 0.87±0.10        | 0.2000        |
| <i>Sirt1</i> | M0 | NM-400 C2 | 0.84±0.04        | 0.0850        |
| <i>Sirt1</i> | M0 | NM-401 C1 | 0.94±0.04        | 0.9500        |
| <i>Sirt1</i> | M0 | NM-401 C2 | 0.96±0.09        | 0.9800        |
| <i>Sirt1</i> | M1 | CNC C1    | 0.95±0.05        | 0.7900        |
| <i>Sirt1</i> | M1 | CNC C2    | 0.98±0.05        | 0.9300        |
| <i>Sirt1</i> | M1 | CNF C1    | 0.98±0.05        | 0.9100        |
| <i>Sirt1</i> | M1 | CNF C2    | 0.91±0.08        | 0.3400        |
| <i>Sirt1</i> | M1 | NM-400 C1 | 0.90±0.08        | 0.3400        |
| <i>Sirt1</i> | M1 | NM-400 C2 | 0.91±0.17        | 0.3200        |
| <i>Sirt1</i> | M1 | NM-401 C1 | 0.81±0.03        | 0.0510        |
| <i>Sirt1</i> | M1 | NM-401 C2 | 0.74±0.06        | 0.0025        |
| <i>Sirt1</i> | M2 | CNC C1    | 1.00±0.11        | 0.6700        |
| <i>Sirt1</i> | M2 | CNC C2    | 0.98±0.16        | 0.8400        |
| <i>Sirt1</i> | M2 | CNF C1    | 1.19±0.15        | 0.0006        |
| <i>Sirt1</i> | M2 | CNF C2    | 1.18±0.10        | 0.0012        |
| <i>Sirt1</i> | M2 | NM-400 C1 | 0.85±0.13        | 0.1200        |
| <i>Sirt1</i> | M2 | NM-400 C2 | 0.76±0.01        | 0.0022        |
| <i>Sirt1</i> | M2 | NM-401 C1 | 0.84±0.08        | 0.1300        |
| <i>Sirt1</i> | M2 | NM-401 C2 | <b>0.60±0.05</b> | <b>0.0000</b> |
| <i>Sirt2</i> | M0 | CNC C1    | 1.27±0.15        | 0.0001        |
| <i>Sirt2</i> | M0 | CNC C2    | 1.10±0.10        | 0.1700        |
| <i>Sirt2</i> | M0 | CNF C1    | 1.24±0.05        | 0.0003        |
| <i>Sirt2</i> | M0 | CNF C2    | 1.09±0.12        | 0.2100        |
| <i>Sirt2</i> | M0 | NM-400 C1 | 0.97±0.08        | 0.6800        |
| <i>Sirt2</i> | M0 | NM-400 C2 | 0.98±0.03        | 0.7300        |
| <i>Sirt2</i> | M0 | NM-401 C1 | 0.91±0.13        | 0.2100        |
| <i>Sirt2</i> | M0 | NM-401 C2 | 0.80±0.03        | 0.0029        |
| <i>Sirt2</i> | M1 | CNC C1    | 1.13±0.06        | 0.1600        |
| <i>Sirt2</i> | M1 | CNC C2    | 1.06±0.05        | 0.8200        |
| <i>Sirt2</i> | M1 | CNF C1    | 1.12±0.05        | 0.1900        |
| <i>Sirt2</i> | M1 | CNF C2    | 1.06±0.03        | 0.7000        |
| <i>Sirt2</i> | M1 | NM-400 C1 | 0.86±0.05        | 0.0180        |
| <i>Sirt2</i> | M1 | NM-400 C2 | 0.81±0.07        | 0.0013        |
| <i>Sirt2</i> | M1 | NM-401 C1 | 0.79±0.07        | 0.0008        |
| <i>Sirt2</i> | M1 | NM-401 C2 | 0.84±0.05        | 0.0038        |
| <i>Sirt2</i> | M2 | CNC C1    | 1.14±0.02        | 0.0300        |
| <i>Sirt2</i> | M2 | CNC C2    | 1.07±0.06        | 0.3800        |
| <i>Sirt2</i> | M2 | CNF C1    | 1.19±0.11        | 0.0032        |
| <i>Sirt2</i> | M2 | CNF C2    | 1.03±0.08        | 0.7600        |

|              |    |           |           |        |
|--------------|----|-----------|-----------|--------|
| <i>Sirt2</i> | M2 | NM-400 C1 | 0.99±0.05 | 0.9200 |
| <i>Sirt2</i> | M2 | NM-400 C2 | 0.96±0.05 | 0.6000 |
| <i>Sirt2</i> | M2 | NM-401 C1 | 0.86±0.14 | 0.0630 |
| <i>Sirt2</i> | M2 | NM-401 C2 | 0.75±0.07 | 0.0002 |
| <i>Smyd2</i> | M0 | CNC C1    | 1.14±0.02 | 0.1900 |
| <i>Smyd2</i> | M0 | CNC C2    | 1.12±0.08 | 0.2700 |
| <i>Smyd2</i> | M0 | CNF C1    | 1.25±0.07 | 0.0099 |
| <i>Smyd2</i> | M0 | CNF C2    | 1.13±0.15 | 0.1500 |
| <i>Smyd2</i> | M0 | NM-400 C1 | 0.93±0.03 | 0.4300 |
| <i>Smyd2</i> | M0 | NM-400 C2 | 0.87±0.05 | 0.1600 |
| <i>Smyd2</i> | M0 | NM-401 C1 | 0.86±0.05 | 0.1400 |
| <i>Smyd2</i> | M0 | NM-401 C2 | 0.90±0.10 | 0.2400 |
| <i>Smyd2</i> | M1 | CNC C1    | 1.15±0.04 | 0.1800 |
| <i>Smyd2</i> | M1 | CNC C2    | 1.03±0.05 | 0.9100 |
| <i>Smyd2</i> | M1 | CNF C1    | 1.33±0.20 | 0.0020 |
| <i>Smyd2</i> | M1 | CNF C2    | 1.15±0.18 | 0.1700 |
| <i>Smyd2</i> | M1 | NM-400 C1 | 0.91±0.04 | 0.3400 |
| <i>Smyd2</i> | M1 | NM-400 C2 | 0.97±0.10 | 0.6600 |
| <i>Smyd2</i> | M1 | NM-401 C1 | 0.90±0.12 | 0.2600 |
| <i>Smyd2</i> | M1 | NM-401 C2 | 0.84±0.08 | 0.0970 |
| <i>Smyd2</i> | M2 | CNC C1    | 1.17±0.07 | 0.1100 |
| <i>Smyd2</i> | M2 | CNC C2    | 1.03±0.07 | 0.9100 |
| <i>Smyd2</i> | M2 | CNF C1    | 1.24±0.17 | 0.0400 |
| <i>Smyd2</i> | M2 | CNF C2    | 1.20±0.11 | 0.0910 |
| <i>Smyd2</i> | M2 | NM-400 C1 | 0.92±0.05 | 0.3600 |
| <i>Smyd2</i> | M2 | NM-400 C2 | 0.85±0.04 | 0.0930 |
| <i>Smyd2</i> | M2 | NM-401 C1 | 0.92±0.03 | 0.3600 |
| <i>Smyd2</i> | M2 | NM-401 C2 | 0.73±0.03 | 0.0059 |
| <i>Smyd3</i> | M0 | CNC C1    | 1.29±0.13 | 0.0025 |
| <i>Smyd3</i> | M0 | CNC C2    | 1.15±0.18 | 0.2400 |
| <i>Smyd3</i> | M0 | CNF C1    | 1.21±0.06 | 0.0430 |
| <i>Smyd3</i> | M0 | CNF C2    | 1.23±0.10 | 0.0270 |
| <i>Smyd3</i> | M0 | NM-400 C1 | 1.00±0.09 | 0.5900 |
| <i>Smyd3</i> | M0 | NM-400 C2 | 0.90±0.06 | 0.0800 |
| <i>Smyd3</i> | M0 | NM-401 C1 | 0.90±0.09 | 0.0950 |
| <i>Smyd3</i> | M0 | NM-401 C2 | 0.88±0.10 | 0.0360 |
| <i>Smyd3</i> | M1 | CNC C1    | 1.18±0.10 | 0.1200 |
| <i>Smyd3</i> | M1 | CNC C2    | 1.13±0.08 | 0.4200 |
| <i>Smyd3</i> | M1 | CNF C1    | 1.13±0.07 | 0.4300 |
| <i>Smyd3</i> | M1 | CNF C2    | 1.18±0.09 | 0.1400 |
| <i>Smyd3</i> | M1 | NM-400 C1 | 0.89±0.08 | 0.0830 |
| <i>Smyd3</i> | M1 | NM-400 C2 | 0.84±0.06 | 0.0130 |
| <i>Smyd3</i> | M1 | NM-401 C1 | 1.01±0.06 | 0.6900 |
| <i>Smyd3</i> | M1 | NM-401 C2 | 1.02±0.12 | 0.8300 |
| <i>Smyd3</i> | M2 | CNC C1    | 1.15±0.05 | 0.0540 |
| <i>Smyd3</i> | M2 | CNC C2    | 1.04±0.10 | 0.6600 |

|                |    |           |                  |               |
|----------------|----|-----------|------------------|---------------|
| <i>Smyd3</i>   | M2 | CNF C1    | 1.15±0.13        | 0.0690        |
| <i>Smyd3</i>   | M2 | CNF C2    | 1.17±0.03        | 0.0330        |
| <i>Smyd3</i>   | M2 | NM-400 C1 | 0.94±0.11        | 0.4800        |
| <i>Smyd3</i>   | M2 | NM-400 C2 | 0.89±0.06        | 0.1500        |
| <i>Smyd3</i>   | M2 | NM-401 C1 | 1.03±0.05        | 0.7900        |
| <i>Smyd3</i>   | M2 | NM-401 C2 | 0.87±0.08        | 0.1200        |
| <i>Smyd5</i>   | M0 | CNC C1    | 1.32±0.12        | 0.0048        |
| <i>Smyd5</i>   | M0 | CNC C2    | 1.24±0.06        | 0.1000        |
| <i>Smyd5</i>   | M0 | CNF C1    | 1.15±0.05        | 0.6700        |
| <i>Smyd5</i>   | M0 | CNF C2    | 1.10±0.11        | 0.9400        |
| <i>Smyd5</i>   | M0 | NM-400 C1 | <b>0.58±0.06</b> | <b>0.0000</b> |
| <i>Smyd5</i>   | M0 | NM-400 C2 | <b>0.61±0.09</b> | <b>0.0000</b> |
| <i>Smyd5</i>   | M0 | NM-401 C1 | <b>0.60±0.06</b> | <b>0.0000</b> |
| <i>Smyd5</i>   | M0 | NM-401 C2 | <b>0.61±0.03</b> | <b>0.0000</b> |
| <i>Smyd5</i>   | M1 | CNC C1    | 1.25±0.04        | 0.0400        |
| <i>Smyd5</i>   | M1 | CNC C2    | 1.27±0.09        | 0.0160        |
| <i>Smyd5</i>   | M1 | CNF C1    | 1.08±0.11        | 0.9100        |
| <i>Smyd5</i>   | M1 | CNF C2    | 1.19±0.13        | 0.2300        |
| <i>Smyd5</i>   | M1 | NM-400 C1 | <b>0.59±0.06</b> | <b>0.0000</b> |
| <i>Smyd5</i>   | M1 | NM-400 C2 | <b>0.59±0.07</b> | <b>0.0000</b> |
| <i>Smyd5</i>   | M1 | NM-401 C1 | <b>0.58±0.05</b> | <b>0.0000</b> |
| <i>Smyd5</i>   | M1 | NM-401 C2 | <b>0.53±0.05</b> | <b>0.0000</b> |
| <i>Smyd5</i>   | M2 | CNC C1    | 1.20±0.08        | 0.5900        |
| <i>Smyd5</i>   | M2 | CNC C2    | 1.21±0.14        | 0.5800        |
| <i>Smyd5</i>   | M2 | CNF C1    | 1.04±0.07        | 0.1600        |
| <i>Smyd5</i>   | M2 | CNF C2    | 1.17±0.04        | 0.8800        |
| <i>Smyd5</i>   | M2 | NM-400 C1 | <b>0.57±0.04</b> | <b>0.0000</b> |
| <i>Smyd5</i>   | M2 | NM-400 C2 | <b>0.55±0.08</b> | <b>0.0000</b> |
| <i>Smyd5</i>   | M2 | NM-401 C1 | <b>0.55±0.09</b> | <b>0.0000</b> |
| <i>Smyd5</i>   | M2 | NM-401 C2 | <b>0.42±0.03</b> | <b>0.0000</b> |
| <i>Suv39h2</i> | M0 | CNC C1    | 0.91±0.08        | 0.0430        |
| <i>Suv39h2</i> | M0 | CNC C2    | 0.93±0.07        | 0.1000        |
| <i>Suv39h2</i> | M0 | CNF C1    | 1.01±0.06        | 0.8700        |
| <i>Suv39h2</i> | M0 | CNF C2    | 1.08±0.10        | 0.3400        |
| <i>Suv39h2</i> | M0 | NM-400 C1 | 1.04±0.10        | 0.8800        |
| <i>Suv39h2</i> | M0 | NM-400 C2 | 0.98±0.05        | 0.5800        |
| <i>Suv39h2</i> | M0 | NM-401 C1 | 1.07±0.04        | 0.4400        |
| <i>Suv39h2</i> | M0 | NM-401 C2 | 1.07±0.03        | 0.5300        |
| <i>Suv39h2</i> | M1 | CNC C1    | 0.99±0.02        | 0.9100        |
| <i>Suv39h2</i> | M1 | CNC C2    | 0.99±0.09        | 0.7800        |
| <i>Suv39h2</i> | M1 | CNF C1    | 0.96±0.04        | 0.5100        |
| <i>Suv39h2</i> | M1 | CNF C2    | 1.11±0.13        | 0.0790        |
| <i>Suv39h2</i> | M1 | NM-400 C1 | 1.01±0.09        | 0.9100        |
| <i>Suv39h2</i> | M1 | NM-400 C2 | 1.01±0.12        | 0.9700        |
| <i>Suv39h2</i> | M1 | NM-401 C1 | 0.97±0.07        | 0.7500        |
| <i>Suv39h2</i> | M1 | NM-401 C2 | 1.06±0.07        | 0.2900        |

|                |    |           |           |        |
|----------------|----|-----------|-----------|--------|
| <i>Suv39h2</i> | M2 | CNC C1    | 0.95±0.05 | 0.5000 |
| <i>Suv39h2</i> | M2 | CNC C2    | 0.94±0.06 | 0.4300 |
| <i>Suv39h2</i> | M2 | CNF C1    | 1.04±0.06 | 0.5000 |
| <i>Suv39h2</i> | M2 | CNF C2    | 1.14±0.07 | 0.0170 |
| <i>Suv39h2</i> | M2 | NM-400 C1 | 1.04±0.09 | 0.5700 |
| <i>Suv39h2</i> | M2 | NM-400 C2 | 0.99±0.04 | 0.9800 |
| <i>Suv39h2</i> | M2 | NM-401 C1 | 1.02±0.04 | 0.6600 |
| <i>Suv39h2</i> | M2 | NM-401 C2 | 1.03±0.11 | 0.5500 |
| <i>Wdr5</i>    | M0 | CNC C1    | 1.10±0.09 | 0.3000 |
| <i>Wdr5</i>    | M0 | CNC C2    | 1.05±0.10 | 0.7600 |
| <i>Wdr5</i>    | M0 | CNF C1    | 1.11±0.09 | 0.2300 |
| <i>Wdr5</i>    | M0 | CNF C2    | 1.14±0.08 | 0.1000 |
| <i>Wdr5</i>    | M0 | NM-400 C1 | 1.07±0.21 | 0.5300 |
| <i>Wdr5</i>    | M0 | NM-400 C2 | 0.93±0.09 | 0.5000 |
| <i>Wdr5</i>    | M0 | NM-401 C1 | 0.98±0.09 | 0.7600 |
| <i>Wdr5</i>    | M0 | NM-401 C2 | 0.96±0.03 | 0.6300 |
| <i>Wdr5</i>    | M1 | CNC C1    | 1.12±0.04 | 0.1900 |
| <i>Wdr5</i>    | M1 | CNC C2    | 1.05±0.09 | 0.7000 |
| <i>Wdr5</i>    | M1 | CNF C1    | 1.04±0.04 | 0.8100 |
| <i>Wdr5</i>    | M1 | CNF C2    | 1.19±0.13 | 0.0300 |
| <i>Wdr5</i>    | M1 | NM-400 C1 | 0.95±0.10 | 0.5300 |
| <i>Wdr5</i>    | M1 | NM-400 C2 | 0.84±0.16 | 0.0320 |
| <i>Wdr5</i>    | M1 | NM-401 C1 | 0.86±0.07 | 0.1000 |
| <i>Wdr5</i>    | M1 | NM-401 C2 | 0.89±0.07 | 0.1900 |
| <i>Wdr5</i>    | M2 | CNC C1    | 1.07±0.06 | 0.5200 |
| <i>Wdr5</i>    | M2 | CNC C2    | 0.98±0.06 | 0.8100 |
| <i>Wdr5</i>    | M2 | CNF C1    | 1.05±0.10 | 0.6100 |
| <i>Wdr5</i>    | M2 | CNF C2    | 1.14±0.12 | 0.1200 |
| <i>Wdr5</i>    | M2 | NM-400 C1 | 1.00±0.14 | 0.9100 |
| <i>Wdr5</i>    | M2 | NM-400 C2 | 0.97±0.04 | 0.6400 |
| <i>Wdr5</i>    | M2 | NM-401 C1 | 0.98±0.10 | 0.7900 |
| <i>Wdr5</i>    | M2 | NM-401 C2 | 0.76±0.06 | 0.0038 |

---

**Supplementary Table 4.** Effects of nanoparticle exposure on known rRNA modifications. M1 and M2 polarized macrophages were exposed to CNF and NM-401 (high C2 dose: 2.7  $\mu\text{g}/\text{cm}^2$ ), respectively (n=3).

| rRNA modification       | M1                      |                     | M2                      |                        |
|-------------------------|-------------------------|---------------------|-------------------------|------------------------|
|                         | Control (mean $\pm$ SD) | CNF (mean $\pm$ SD) | Control (mean $\pm$ SD) | NM-401 (mean $\pm$ SD) |
| <b>m<sup>1</sup>A</b>   | 2,7 $\pm$ 0,0           | 2,7 $\pm$ 0,0       | 2,7 $\pm$ 0,1           | 2,7 $\pm$ 0,2          |
| <b>m<sup>6</sup>A</b>   | 2,6 $\pm$ 0,1           | 2,6 $\pm$ 0,0       | 2,6 $\pm$ 0,0           | 2,6 $\pm$ 0,2          |
| <b>m<sup>6,6</sup>A</b> | 2,7 $\pm$ 0,2           | 2,9 $\pm$ 0,0       | 2,8 $\pm$ 0,1           | 3,0 $\pm$ 0,2          |
| <b>m<sup>5</sup>C</b>   | 4,4 $\pm$ 0,1           | 4,3 $\pm$ 0,2       | 4,4 $\pm$ 0,1           | 4,3 $\pm$ 0,2          |
| <b>ac<sup>4</sup>C</b>  | 2,8 $\pm$ 0,1           | 3,0 $\pm$ 0,0       | 2,8 $\pm$ 0,0           | 2,9 $\pm$ 0,2          |
| <b>m<sup>7</sup>G</b>   | 2,4 $\pm$ 0,0           | 2,5 $\pm$ 0,1       | 2,4 $\pm$ 0,1           | 2,5 $\pm$ 0,2          |
| <b>m<sup>2</sup>G</b>   | 0,9 $\pm$ 0,1           | 0,7 $\pm$ 0,1       | 0,8 $\pm$ 0,1           | 0,8 $\pm$ 0,1          |
| <b>Y</b>                | 121,8 $\pm$ 1,9         | 122,0 $\pm$ 4,0     | 120,4 $\pm$ 1,2         | 119,6 $\pm$ 8,3        |
| <b>m<sup>3</sup>U</b>   | 1,3 $\pm$ 0,1           | 1,3 $\pm$ 0,0       | 1,3 $\pm$ 0,0           | 1,3 $\pm$ 0,1          |
| <b>Am</b>               | 41,4 $\pm$ 4,2          | 41,1 $\pm$ 1,6      | 45,1 $\pm$ 5,4          | 44,6 $\pm$ 6,4         |
| <b>Cm</b>               | 27,5 $\pm$ 2,5          | 27,5 $\pm$ 1,0      | 30,6 $\pm$ 3,0          | 30,2 $\pm$ 4,5         |
| <b>Gm</b>               | 37,1 $\pm$ 4,5          | 38,3 $\pm$ 1,3      | 41,3 $\pm$ 4,5          | 40,4 $\pm$ 4,8         |
| <b>Um</b>               | 23,5 $\pm$ 2,6          | 23,6 $\pm$ 1,0      | 25,0 $\pm$ 2,0          | 25,1 $\pm$ 4,1         |
